1 **S1P controls endothelial sphingolipid homeostasis via ORMDL**

2

3 Linda Sasset, PhD<sup>1,2</sup>; Kamrul H. Chowdhury, PhD<sup>3</sup>; Onorina L. Manzo, PhD<sup>1,2,4</sup>; Luisa  
4 Rubinelli, BSc<sup>1,2</sup>; Csaba Konrad, PhD<sup>3</sup>; J. Alan Maschek<sup>3</sup>; Giovanni Manfredi, MD PhD<sup>2</sup>;  
5 William L. Holland, PhD<sup>3</sup>; Annarita Di Lorenzo, PhD<sup>1,2\*</sup>

6

7 <sup>1</sup>Department of Pathology and Laboratory Medicine, Cardiovascular Research Institute,  
8 Weill Cornell Medicine, 1300 York Avenue, New York, NY, 10021

9 <sup>2</sup>Brain and Mind Research Institute, Weill Cornell Medicine, 1300 York Avenue, New  
10 York, NY, 10021

11 <sup>3</sup>Department of Nutrition and Integrative Physiology, University of Utah College of  
12 Health, Salt Lake City, UT, 84112

13 <sup>4</sup>Department of Pharmacy, University of Naples "Federico II", Naples, Italy

14

15

16

17

18

19

20

21 **\*Corresponding author:**

22 Annarita Di Lorenzo, Ph.D., Department of Pathology and Laboratory Medicine,  
23 Cardiovascular Research Institute, Feil Brain and Mind Research Institute, Weill Cornell  
24 Medical College, 1300 York Avenue, New York, NY, 10021, USA, Phone: (212) 746-  
25 6476, Fax: (212) 746-2290, E-mail:[and2039@med.cornell.edu](mailto:and2039@med.cornell.edu)

26

27

28

29

30

31

## 32 **Abstract**

33 Sphingolipids (SL) are both membrane building blocks and potent signaling molecules  
34 regulating a variety of cellular functions in both physiological and pathological conditions.  
35 Under normal physiology, sphingolipid levels are tightly regulated, whereas disruption of  
36 sphingolipid homeostasis and signaling has been implicated in diabetes, cancer,  
37 cardiovascular and autoimmune diseases. Yet, mechanisms governing cellular sensing  
38 of SL, and according regulation of their biosynthesis remain largely unknown.  
39 In yeast, serine palmitoyltransferase (SPT), catalyzing the first and rate limiting step of  
40 sphingolipid *de novo* biosynthesis, is negatively regulated by Orosomucoid 1 and 2 (Orm)  
41 proteins. Lowering sphingolipid levels triggers Orms phosphorylation, resulting in the  
42 removal of the inhibitory brake on SPT to enhance sphingolipid *de novo* biosynthesis.  
43 However, mammalian orthologs ORMDLs lack the N-terminus hosting the phosphosites.  
44 Thus, which sphingolipid(s) are sensed by the cells, and mechanisms of homeostasis  
45 remain largely unknown. This study is aimed at filling this knowledge gap.  
46 Here, we identify sphingosine-1-phosphate (S1P) as the key sphingolipid sensed by  
47 endothelial cells via S1PRs. The increase of S1P-S1PR signaling stabilizes ORMDLs,  
48 which downregulates SPT activity to maintain SL homeostasis. These findings reveal the  
49 S1PR/ORMDLs axis as the sensor-effector unit regulating SPT activity accordingly.  
50 Mechanistically, the hydroxylation of ORMDLs at Pro137 allows a constitutive  
51 degradation of ORMDLs via ubiquitin-proteasome pathway, therefore preserving SPT  
52 activity at steady state. The disruption of the S1PR/ORMDL axis results in ceramide  
53 accrual, mitochondrial dysfunction, and impaired signal transduction, all leading to

54 endothelial dysfunction, which is an early event in the onset of cardio- and  
55 cerebrovascular diseases.

56 The disruption of S1P-ORMDL-SPT signaling may be implicated in the pathogenesis of  
57 conditions such as diabetes, cancer, cardiometabolic disorders, and neurodegeneration,  
58 all characterized by deranged sphingolipid metabolism. Our discovery may provide the  
59 molecular basis for a therapeutic intervention to restore sphingolipid homeostasis.

60

## 61 **INTRODUCTION**

62 Formed by the subunits SPT Long Chain 1 and 2 (SPTLC1 and SPTLC2), mammalian  
63 SPT activity is enhanced by small subunits ssSPTa and ssSPTb<sup>1</sup>, and decreased by  
64 ORMDLs<sup>2</sup> and Nogo-B<sup>3</sup>. The requirement of sphingolipid *de novo* biosynthesis for viability  
65 and health is underlined by genetic evidence in humans and mice. SPTLC1/2 mutations  
66 cause Hereditary Sensory Neuropathy Type I<sup>4,5</sup>, SNPs in ORMDLs are associated to  
67 asthma<sup>6</sup> and atherosclerosis<sup>7</sup>, while the excision of *Sptlc1* or *Sptlc2* genes in mice is  
68 embryonically lethal<sup>8</sup>. In yeast, Orms (*Orm1* and *Orm2*) proteins regulate SL  
69 homeostasis, with the phosphorylation of Orms releasing the brake on SPT<sup>2</sup>. However,  
70 mammalian ortholog ORMDLs lack the N-terminal regions hosting these phosphosites<sup>9</sup>.  
71 How cells sense SL, monitor the rate of the *de novo* biosynthesis, and what goes awry in  
72 disease remain unknown.

73 S1P signaling is critical in development, physiological homeostasis, and diseases<sup>10</sup>.

74 Genetic disruption of the S1P pathway results in congenital defects in humans, including  
75 Sjogren-Larsson syndrome, adrenal insufficiency and nephrosis, hearing impairment,  
76 embryonic lethality, and post-natal organ defects in mice, underlining that functional S1P

77 signaling is a prerequisite for health. Within the cardiovascular and immune systems, S1P  
78 is necessary for vascular development<sup>11</sup> and homeostasis<sup>12</sup> as well as immune cell  
79 trafficking<sup>13</sup>, mainly via S1PR1. Endothelial S1PR1 controls blood flow and pressure via  
80 nitric oxide (NO) formation<sup>3,14,15</sup>, and maintains the quiescent state of the endothelium by  
81 exerting anti-inflammatory<sup>16,17</sup> and barrier<sup>18</sup> functions. The endothelium is also an  
82 important source of plasma ceramide<sup>19</sup> and S1P<sup>20</sup>, which is transported outside of the  
83 cells by the bonafide transporter for S1P, Spinster-2 (Spns2)<sup>21</sup>. Autocrine S1P signaling  
84 controls flow-induced vasodilation, which is a vital function of blood vessels to meet the  
85 tissue metabolic demands<sup>22</sup>. Disruption of endothelial S1P signaling by deletion of  
86 S1PR1<sup>15</sup> or Spns2<sup>23</sup> results in vascular<sup>15,23</sup> and barrier<sup>18</sup> dysfunctions, severe  
87 hypertension<sup>15,23</sup> and atherosclerosis<sup>16</sup>, underlying the fundamental role of S1P-S1PR1  
88 signaling in preserving vascular health.

89

## 90 **RESULTS**

### 91 **S1P inhibits SPT activity via ORMDLs stabilization**

92 This study tested the hypothesis that S1P signaling is a fundamental molecular  
93 mechanism used by the cells to maintain sphingolipid homeostasis. The capability of  
94 S1PR to transduce S1P levels in a biological signal, and the specificity and dynamicity of  
95 this interaction, make of S1P-S1PR an ideal metabolite-sensor system to regulate cellular  
96 sphingolipid homeostasis through an effector yet to be identified. To test this hypothesis,  
97 we used murine EC (mEC) inducible knockout for *S1pr1* (**Fig. 1A**). Interestingly, *S1pr1*  
98 deletion resulted in increased SPT activity and SL levels (**Fig. 1A-C** and **Supplementary**  
99 **Fig. 1**) suggesting that S1PR1 signaling could function as negative feedback on



100 sphingolipid metabolism. Based on this finding, we hypothesized that S1P is the key  
101 sphingolipid metabolite sensed by the cells to modulate the sphingolipid *de novo*  
102 biosynthesis via SPT (effector). Interestingly, S1P was able to rapidly decrease SPT  
103 activity of human umbilical vein EC (HUVEC, **Fig. 1D**). Recent studies suggested that  
104 ceramide could modulate the ORMDL-SPT complex<sup>24-26</sup>. In line with this finding, the  
105 addition of C16:0-ceramide significantly decreased SPT activity in HUVEC (**Fig. 1E**).  
106 However, this effect was abolished by SKI II, an inhibitor of sphingosine kinase-1 (SphK1)  
107 and SphK2 (**Fig. 1F**), which give rise to S1P via the phosphorylation of sphingosine,  
108 suggesting that S1P derived from ceramide metabolism mediates the inhibitory effects of  
109 ceramide on SPT. mEC with genetic deletion of *Sphk1* and *Sphk2* (*Sphk1,2<sup>ECKO</sup>*, **Fig. 1G**)  
110 corroborated that S1P formation is necessary for ceramide to downregulate SPT activity  
111 (**Fig. 1H**). Of note, basal SPT activity was significantly upregulated in *Sphk1,2<sup>ECKO</sup>* (**Fig.**  
112 **1H**), revealing a direct role of endothelial-derived S1P in constraining SPT activity.  
113 Contrary to Orms in yeast, ORMDLs are not phosphorylated<sup>24</sup> in mammals, and our data  
114 corroborated this finding (**Supplementary Fig. 2**). Interestingly, S1P stimulation triggered  
115 a rapid increase in ORMDLs levels (ca. 2.5-fold), without affecting Nogo-B, SPTLC1 or  
116 SPTLC2 expression (**Fig. 1I,L**). Ceramide also induced a rapid increase in ORMDLs (**Fig.**  
117 **1M**), which was abolished by SKI II inhibitor, consistent with S1P mediating ceramide  
118 inhibition of SPT activity (**Fig. 1F**). Both NOGO-B (**Fig. 1N**) and ORMDLs (**Fig. 1O**) knock-  
119 down resulted in a higher SPT activity, in line with a constitutive inhibition of SPT.  
120 However, only knock-down of ORMDLs (**Fig. 1O**) abolished the S1P downregulation of  
121 SPT activity, suggesting that ORMDLs and not Nogo-B are accountable for a nimble  
122 regulation of SPT activity by S1P (**Fig. 1P**).

123

124 **ORMDLs are degraded via PHD-mediated ubiquitination and proteasomal**  
125 **degradation**

126 We next sought to unveil the molecular mechanism orchestrating the acute changes of  
127 ORMDLs levels. Protein abundance reflects the integration of synthesis and degradation  
128 rates<sup>27</sup>. The inhibition of translation with cycloheximide (CHX) showed that ORMDL half-  
129 life was 1.7h (**Fig. 2A**), indicating a relatively fast turnover. To identify the regulatory  
130 mechanisms controlling ORMDLs levels, we analyzed ORMDLs sequence properties and  
131 observed the presence in the C-terminus of a conserved prolyl hydroxylase (PHD)  
132 consensus domain, known to regulate the levels of hypoxia-inducible factor 1 $\alpha$  (HIF-1 $\alpha$ )<sup>28</sup>  
133 and other proteins<sup>29</sup> via ubiquitination (**Fig. 2B**). Interestingly, the inhibition of PHD activity  
134 with the hydroxylase inhibitor dimethyloxallylglycine (DMOG) elevated ORMDLs to the  
135 same extent as S1P, suggesting that PHD-mediated ubiquitination controlled the  
136 abundance of ORMDLs (**Fig. 2C**). A retro-translocation from the ER to the cytosol is  
137 necessary for ER-membrane associated protein degradation (ERAD)<sup>30</sup>. The inhibition of  
138 dislocase p97/VCP with Eeyarestatin-1 (EER1) led to ORMDLs accumulation (**Fig. 2D**),  
139 implicating the retro-translocation as regulatory step of ORMDLs levels. Eukaryotic cells  
140 rely on the ubiquitin-proteasome pathway as a major degradation system for short-lived  
141 proteins<sup>31</sup>. MG132, proteasome inhibitor, significantly augmented ORMDLs levels in  
142 basal conditions but not in presence of S1P, most likely because S1P already maximized  
143 ORMDLs stability by inhibiting their degradation (**Fig. 2E**). This data highlights  
144 proteasomal degradation as a primary mechanism to control mammalian ORMDLs levels.

145 ORMDL3 is the most abundant ORMDL isoform in EC (**Supplementary Fig. 3A**), and  
146 SNP for ORMDL3 are associated with asthma<sup>6</sup> and atherosclerosis<sup>7</sup>. To demonstrate the  
147 requirement of PHD-mediated hydroxylation for ubiquitination-mediated degradation of  
148 ORMDLs, we mutated P137 to A in the PHD consensus domain of ORMDL3. The P137  
149 to A mutation was sufficient to stabilize ORMDL3 to the same levels of S1P, DMOG,  
150 EER1, and MG132 (**Fig. 2F**). Interestingly, the half-life of ORMDL3-P137A was  
151 remarkably higher than the native form, 24h and 1.7h respectively (**Fig. 2G,H**). Of note,  
152 the expression of mutant ORMDL3 did not affect the stability of SPTLC1 or SPTLC2 (**Fig.**  
153 **2G** and **Supplementary Fig. 3B,C**). Lys-48-linked ubiquitination targets protein for  
154 degradation<sup>32</sup>. WB analysis of immunoprecipitated ORMDL3 showed that Lys-48-linked  
155 polyubiquitination was significantly reduced in the ORMDL3-P137A compared to native  
156 ORMDL3 (**Fig. 2I**). Finally, to investigate the biological significance of P137 hydroxylation,  
157 native and mutant ORMDL3 were overexpressed in HUVEC depleted of endogenous  
158 ORMDLs via siRNA approach. In HUVEC expressing ORMDL3-P137A, SPT activity was  
159 significantly suppressed at baseline and no longer modulated by S1P (**Fig. 2L**).  
160 Mechanistically, these data strongly support the model in which ORMDLs undergo PHD-  
161 mediated hydroxylation of P137, ubiquitination, extraction from ER membrane via ERAD  
162 pathway, and ultimately proteasome-mediated degradation (**Fig. 2M**). S1P signaling  
163 downregulates SPT activity by stabilizing ORMDLs via inhibition of PHD-mediated  
164 hydroxylation.

165

166 **Endothelial-derived S1P inhibits de novo sphingolipid biosynthesis via S1PRs**

167 Quiescent EC express mainly S1PR1, and less abundantly S1PR3<sup>33</sup>. The loss of either  
168 S1PR1 (**Fig 1A**) or S1PR3 (**Supplementary Fig. 4A**) leads to constitutive increases of  
169 SPT activity (**Fig. 1B** and **Supplementary Fig. 4B**), suggesting that S1PR1,3 signaling  
170 provides constitutive inhibitory feedback on SPT. Thus, to investigate the role of S1PR1,3  
171 in the dynamic regulation of SPT activity by S1P, mEC were depleted of both S1P  
172 receptors. Interestingly, the loss of S1PR1,3 abolished the downregulation of SPT activity  
173 (**Fig. 3A**), as well as the stabilization of ORMDLs, by exogenous S1P (**Fig. 3B**),  
174 suggesting that these receptors are necessary to sense S1P abundance and operate a  
175 negative feedback to SPT via ORMDLs. Consistently, S1PR1,3 deletion significantly  
176 raised basal SPT activity (**Fig. 3A**), as well as total ceramides (**Fig. 3C**) and  
177 glucosylceramides (**Fig. 3D**) levels. Cellular SL results from the *de novo* and recycling  
178 pathways. To investigate the impact of S1P on SPT activity, we used stable-isotope  
179 labeled serine (L-serine-<sup>13</sup>C<sub>3</sub>,<sup>15</sup>N) to trace the *de novo* synthesized SL (**Fig. 3E**).  
180 Exogenous S1P significantly decreased labelled ceramides and glucosylceramides (**Fig.**  
181 **3F-I**), corroborating the S1P-induced downregulation of SPT activity (**Fig. 1D**). However,  
182 in absence of S1PR1,3, labeled ceramides and glucosylceramides were significantly  
183 elevated in basal conditions and were not decreased by exogenous S1P compared to  
184 control EC (**Fig. 3F-I**), suggesting that S1PR1,3 are necessary to mediate S1P  
185 downregulation of SPT activity. Unlabeled ceramides showed a similar trend  
186 (**Supplementary Fig. 5A-E**), suggesting that the primary influence exerted on  
187 sphingolipid production was indeed from *de novo* sphingolipid biosynthesis.  
188 Considering that the deletion of SphK1,2 dramatically upregulated SPT activity (**Fig. 1H**),  
189 we hypothesized that S1PR1,3 can be activated in an autocrine manner by locally

190 produced S1P to initiate the negative feedback on SPT. To preserve the formation of  
191 intracellular S1P and its degradation by S1P lyase, representing the catabolic exit of the  
192 pathway, instead of *Sphk1,2* genes, *Spns2* was deleted to prevent the transporter-  
193 mediated cellular excretion of S1P (**Fig. 3L**). Thus, mEC from *Spns2<sup>ff</sup>* VE-Cad-CreERT2  
194 mice were used *in vitro*. *Spns2* deletion significantly raised SPT activity, suggesting a  
195 constitutive inhibitory function of endogenous S1P on SPT via inside-outside signaling  
196 (**Fig. 3M**). Importantly, exogenous S1P was able to downregulate SPT activity in  
197 *Spns2<sup>ECKO</sup>* as in *Spns2<sup>ff</sup>* EC (**Fig. 3M**), indicating that while the loss of *Spns2* disrupted  
198 the autocrine S1P signal on SPT, the S1PR-ORMDL-SPT signaling pathway was  
199 preserved. Consistently with these findings, total ceramides (**Fig. 3O** and  
200 **Supplementary Fig. 5F,G**) and glucosylceramides (**Fig. 3P** and **Supplementary Fig.**  
201 **5H-L**), were upregulated in *Spns2<sup>ECKO</sup>* vs. *Spns2<sup>ff</sup>*. The measure of sphingolipid flux with  
202 isotope-labeled serine showed that the loss of *Spns2* increased the *de novo* synthesized  
203 ceramides and glucosylceramides in basal conditions (**Fig. 3Q-T**), while preserving the  
204 downregulation in response to exogenous S1P (**Fig. 3Q-T**), in line with SPT activity data  
205 (**Fig. 3M**). Lastly, SPT activity was significantly higher in *Spns2<sup>ECKO</sup>* mouse lung  
206 microsome compared to *Spns2<sup>ff</sup>* (**Fig. 3U**), corroborating the function of SPNS2-S1P  
207 negative feedback on SPT *in vivo*. These results support an important role of the  
208 endothelial-derived S1P-S1PR signaling in maintaining sphingolipid homeostasis via  
209 stabilization of ORMDL-SPT complex.

210

211 **Ceramide accrual leads to endothelial and mitochondrial dysfunction**

212 Ceramides regulate membrane biophysical properties, particularly of lipid rafts, important  
213 signaling platforms<sup>34-36</sup>. Recently, we reported that optimal ceramide levels are necessary  
214 to preserve endothelial signal transduction to different agonists, including VEGF and  
215 insulin<sup>19</sup>. The loss of Spns2 disrupted the cellular SL sensing mechanism and increased  
216 SL, including ceramides (**Fig 3O**). Thus, to test the hypothesis that in absence of Spns2  
217 ceramide accrual impairs endothelial signal transduction, we performed a series of  
218 experiments in primary mEC *in vitro* isolated from Spns2<sup>ECKO</sup> and Spns2<sup>ff</sup> mice. The  
219 activation of both VEGFR2 and insulin receptor (IR), and downstream signaling, were  
220 blunted in Spns2<sup>ECKO</sup> compared to Spns2<sup>ff</sup> mEC (**Fig. 4A-C**), although the receptor  
221 expression was unchanged, suggesting that ceramide accrual in absence of Spns2  
222 impairs endothelial signal transduction. To further explore the consequences of Spns2  
223 deletion in more physiological setting, we used mesenteric arteries (MA) *ex vivo*. In line  
224 with endothelial signaling data, vasorelaxation to both VEGF (**Fig. 4D**) and insulin (**Fig.**  
225 **4E**) was significantly diminished in Spns2<sup>ECKO</sup> compared Spns2<sup>ff</sup> MA. On the contrary,  
226 acetylcholine and sodium nitroprusside (SNP) induced vasorelaxation were not affected  
227 by altered ceramide levels (**Fig. 4F,G**), as previously reported<sup>19</sup>. Interestingly, mouse  
228 treatment with myriocin, an inhibitor of SPT, restored VEGF- and Insulin-dependent  
229 vasorelaxation (**Fig. 4D,E**), consistent with a role of ceramide in endothelial dysfunction<sup>37</sup>.  
230 Multiple lines of evidence have shown that ceramide accrual is causal of mitochondrial  
231 dysfunction, oxidative stress<sup>38,39</sup>, and apoptosis<sup>40</sup>. Loss of Spns2 resulted in decreased  
232 maximal respiration and reduced spare respiratory capacity (**Fig. 4H,I**). Extracellular  
233 acidification rate, an indirect index of mitochondrial dysfunction, suggests an increased  
234 ability to upregulate aerobic glycolysis upon the loss of mitochondrial ATP production

235 caused by inhibition of the ATPase by oligomycin (**Fig. 4L,M**). Spns2<sup>ECKO</sup> EC showed  
236 decreased membrane potential (**Fig. 4N**), smaller mitochondrial size (**Fig. 4O**) and  
237 increased number of mitochondria per cell (**Fig. 4P**), as assessed by TMRM staining. All  
238 together, these findings suggests a respiratory chain dysfunction that result in lower  
239 mitochondrial polarization, fragmentation of mitochondria and adaptive changes in  
240 glycolysis as an alternate source of energy production, supporting the concept that Spns2  
241 deletion increases sphingolipid de novo biosynthesis and ceramide levels, hence the  
242 susceptibility of the cells to metabolic stress.

243 Next, we investigated whether the ceramide accrual in absence of Spns2 heighten the  
244 susceptibility of the EC to apoptosis induced by palmitate, substrate of SPT. In Spns2<sup>ECKO</sup>  
245 EC baseline apoptosis was increased to the same extent of palmitate-induced apoptosis  
246 in Spns2<sup>ff</sup> EC. The loss of Spns2 dramatically increased the apoptosis induced by  
247 palmitate (**Fig. 4P,Q**).

248 Altogether, these results show that disruption of S1P-S1PR-ORMDL negative feedback  
249 on SPT results in unrestricted levels of SL, including ceramides, triggering mitochondrial  
250 dysfunction, apoptosis, and impaired vascular tone regulation, which all underline  
251 endothelial dysfunction, an early event in the pathogenesis of cardiovascular diseases,  
252 including atherosclerosis.

253

## 254 **DISCUSSION**

255 SL, a minor class of mammalian lipids, have gained much attention because emerging  
256 pre-clinical and clinical evidence established a strong link between altered sphingolipid  
257 homeostasis and diseases<sup>41,42</sup>, including atherosclerosis<sup>43</sup>, coronary artery disease<sup>44</sup>,

258 myocardial infarction<sup>45</sup>, heart failure<sup>46,47</sup>, hypertension<sup>48</sup>, and type 2 diabetes<sup>49,50</sup>.  
259 However, how cells sense sphingolipid levels and regulate their biosynthesis accordingly  
260 remains poorly understood. Because SPT catalyzes the rate-limiting step of the pathway,  
261 there has been much effort in understanding how this enzyme is modulated in response  
262 to cellular sphingolipid levels. In this study, we identified a sensing mechanism used by  
263 the cells to maintain sphingolipid homeostasis and assure proper cellular functions. Our  
264 study discovered S1P as the specific SL metabolite sensed by the cells; S1P actions  
265 downregulate SPT activity via S1PR/ORMDL negative feedback to maintain sphingolipid  
266 homeostasis.

267 In yeast the phosphorylation of Orms releases the interaction with SPT, hence  
268 sphingolipid *de novo* biosynthesis is upregulated<sup>2</sup>. However, in mammalian orthologs  
269 ORMDLs lack the N-terminus hosting the phosphosites<sup>9</sup>. Considering that sphingolipid  
270 homeostasis is necessary to preserve cellular functions and health, it is conceivable that  
271 complex regulatory mechanisms exist to regulate SPT-ORMDL interactions in response  
272 to metabolic and environmental cues, at transcriptional, translational and post-  
273 translational levels. For instance, inflammatory stimuli and changes in SL can upregulate  
274 the transcription<sup>51</sup> and the translation<sup>25</sup> of ORMDL, respectively, although the underlying  
275 molecular mechanisms remain unknown. Previous works from Wattenberg's group<sup>24,26</sup>,  
276 using cell-free isolated membranes or permeabilized cells, suggested that C6:0- and  
277 C8:0-ceramide (10-20 $\mu$ M) can acutely downregulate SPT activity, probably by interacting  
278 with the SPT-ORMDLs complex. However, by using multiple genetic and pharmacological  
279 strategies our data showed that when S1P formation was inhibited, ceramide was no  
280 longer able to modulate SPT activity.



281 ORMDLs have a relatively short half-life (ca. 1.7h, **Fig. 2A,H**). Mechanistically, our data  
282 show that PHD-mediated hydroxylation of Pro137 enforces a constitutive degradation of  
283 ORMDLs via ER-associated degradation and ubiquitin-proteasome pathway (**Fig. 2M**),  
284 hence preserving a steady-state SPT activity. Upregulation of S1P signaling inhibits PHD-  
285 mediated Pro137 hydroxylation, resulting in ORMDLs stability and downregulation of SPT  
286 activity. It is conceivable that this sensing-effector mechanism that maintains sphingolipid  
287 homeostasis is not only functional in the EC but also in other cell types. Further studies  
288 are needed to explore this possibility.

289 S1P is known to induce barrier function<sup>18</sup>, NO production<sup>3,14,15</sup>, as well as cell migration  
290 and survival. In addition to known functions, our study discovered that a fundamental  
291 function of S1P is to maintain sphingolipid homeostasis via S1PR-ORMDL negative  
292 feedback on SPT. Genetic and pharmacological disruption of endothelial S1P autocrine  
293 signaling at multiple levels, including *Sphks*, *Spns2*, and *S1prs*, support the direct role of  
294 S1P-S1PR signaling in modulating SPT activity via stabilization of ORMDLs. How cells  
295 can sense SL has been a longstanding question. Our findings identified S1P-S1PR as  
296 the sensor-effector unit by which cells can sense SL and maintain homeostasis by a  
297 nimble modulation of SPT activity via ORMDLs.

298 The disruption of S1P negative feedback on SPT leads to uncontrolled sphingolipid *de*  
299 *novo* biosynthesis and ceramide accumulation, resulting in mitochondrial dysfunction,  
300 apoptosis, and impaired signal transduction and endothelial-regulated vascular tone,  
301 which are all manifestations of endothelial dysfunction, an early event in the onset of  
302 cardiovascular diseases, including atherosclerosis and hypertension. Postnatally the  
303 disruption of S1P signaling results in permeability<sup>18</sup>, hypertension<sup>15,23</sup>, atherosclerosis<sup>16</sup>,

304 and heart failure<sup>52</sup>, as result of the loss of S1P biological actions, including the  
305 enhancement of endothelial barrier functions and NO production, and downregulation of  
306 NFkB pathway<sup>16</sup>. In addition to these canonical cardiovascular functions, our data  
307 identified a novel fundamental function of S1P which is to maintain sphingolipid  
308 homoeostasis and protect the cells from a “metabolic catastrophe” due to uncontrolled  
309 ceramide accrual, causing cellular and organ dysfunctions.

310 The clinical significance of this signaling mechanisms is also underlined by the correlation  
311 of single nucleotide polymorphisms (SNP) in *SphK1*<sup>53</sup>, *S1pr1*<sup>54</sup>, and *Ormdl3*<sup>7</sup> with the risk  
312 of atherosclerosis. Genetic deletion of endothelial *S1pr1* in mice significantly elevated  
313 BP<sup>15</sup>. Interestingly, chronic administration fingolimod, a functional antagonist of S1PR1  
314 approved by the FDA for the treatment of relapsing remitting multiple sclerosis<sup>55</sup>, also  
315 significantly increased BP, in line with the loss endothelial *S1pr1*<sup>15</sup>. Our findings suggest  
316 that an additional biological consequence of fingolimod on-target actions on S1PRs is the  
317 disruption of S1P negative signaling on SPT, and therefore the homeostasis of SL, at  
318 least in cell type expressing high levels of S1PR1, such as endothelial and immune  
319 cells<sup>13,33</sup>. Further studies are needed to investigate the impact of fingolimod on  
320 sphingolipid sensing and homeostatic pathway of the cells.

321 This study reveal a novel mechanism by which cells can sense SL and regulate  
322 sphingolipid biosynthesis accordingly. S1P is the metabolite sensed by the cells to  
323 downregulate SPT activity via S1PR-ORMDI signaling. Whether the disruption of this  
324 negative feedback plays a role in the pathogenesis human diseases remains to be  
325 investigated.

326

## 327 **MATERIAL AND METHODS**

328 **Mouse models.** We generated conditional mouse model lacking endothelial S1PR1,  
329 namely S1pr1<sup>ECKO</sup>; lacking endothelial SphK1,2, namely SphK1,2<sup>ECKO</sup>; and lacking  
330 endothelial Spns2, namely Spns2<sup>ECKO</sup>. S1pr1<sup>ff</sup> (floxed S1pr1)<sup>56</sup>, SphK1,2<sup>ff</sup> (floxed  
331 SphK1,2)<sup>57</sup>, and Spns2<sup>ff</sup> (floxed Spns2)<sup>58</sup> mice were crossed with transgenic mice in  
332 which the VE-cadherin promoter drives expression of tamoxifen-responsive Cre (VE-Cad-  
333 CreERT2), such that tamoxifen treatment selectively deletes the loxP-flanked (floxed)  
334 region of S1pr1 in endothelial cells (EC)<sup>59</sup>. S1pr1<sup>ECKO</sup> and S1pr1<sup>ff</sup>, and SphK1,2<sup>ECKO</sup> and  
335 SphK1,2<sup>ff</sup> were used only for isolation of mouse liver EC. To delete Sptlc2 in EC, 7- to 8-  
336 week-old male mice were injected intraperitoneally with 20 mg/kg of tamoxifen daily for 5  
337 consecutive days. All animal experiments were approved by the Weill Cornell Institutional  
338 Animal Care and Use Committee.

339

340 **Isolation of mouse liver EC.** Liver EC, but not lung and heart EC, are responsive to 4-  
341 hydroxytamoxifen-induced gene excision *in vitro*. Four-week-old female and male mice  
342 were used to isolate EC. Briefly, liver were cut into small pieces and incubated in a  
343 solution of 2mg/mL collagenase I (Alfa Aesar, #J62406), 1U/mL dispase (Stemcell  
344 Technologies, #07913) and 100µg/mL DNase I (Roche, # 10104159001), followed by  
345 mechanical dissociation. EC were isolated with CD144 antibody-conjugated dynabeads  
346 (CD144 antibody, BD bioscience, #555289; dynabeads, ThermoFisher Scientific,  
347 #111035). Isolated EC were cultured in DMEM (Lonza, #12709-F) with 20% FBS (R&D  
348 Systems, #S11150H), 100µg/mL heparin (Sigma, #H3393), and 25µg/mL ECGF (Alfa  
349 Aesar, #J64516). For gene excision, EC were treated with 1µM 4-hydroxytamoxifen

350 (Cayman Chemical, #14854) for 3 consecutive days. Before treatment with S1P (300nM,  
351 30min; Cayman Chemical, #62570), C16:0-ceramide (300nM, 30min; Avanti, #868516),  
352 VEGF (100ng/mL, 2min; Peprotech, #100-20), or Insulin (1U/mL, 2min), ECs were  
353 cultured in DMEM with 10% Charcoal-Stripped FBS for 18h, followed by 6h starvation in  
354 DMEM with 0.1% Charcoal-Stripped FBS.

355

356 **Experimental protocol with HUVEC.** HUVEC (LifeLine Cell Technology, cat# FC- 0044)  
357 were grown in EBM-2 (Lonza, cat# CC-3156) and supplemented with EGM-2 Endothelial  
358 Cell Growth Medium-2 BulletKit (Lonza, cat# CC-3162) and 10% FBS. Before treatment  
359 HUVEC were cultured in EBM-2 with 10% Charcoal-Stripped FBS for 18h, followed by 6h  
360 starvation in EMB-2 with 0.1% Charcoal-Stripped FBS. The following treatments were  
361 used: S1P (300nM, 30min), C16:0-Ceramide (300nM, 30min), SKI II<sup>60</sup> (1μM, 30min  
362 before C16:0-Cer; Cayman Chemical, #10009222), CHX (10μM, for the indicated time;  
363 Cayman Chemical, #14126), DMOG<sup>28</sup> (1mM, 1h; Cayman Chemical, #72210),  
364 Eeyarestatin 1<sup>61</sup> (EER1, 10μM, 1h; Cayman Chemical, #10012609); MG132 (10μM, 1h;  
365 Cayman Chemical, #13697).

366

367 **SPT activity assay.** SPT activity in HUVEC and EC was measured as previously  
368 described<sup>19</sup>. Briefly, the assay was conducted in 0.1mL of SPT reaction buffer composed  
369 by: 0.1M HEPES pH 8.3, 5mM DTT, 2.5mM EDTA, 50μM pyridoxal 5'-phosphate (Sigma,  
370 #P9255), 0.45μM [<sup>3</sup>H]serine (American Radiolabeled Chemicals, #0246), 0.2mM  
371 palmitoyl-CoA (Sigma, #P9715) and 150μg of protein lysates. After 15 min at 37 °C, the  
372 reaction was stopped with NH<sub>4</sub>OH and the reaction product 3-ketosphinganine converted

373 into sphinganine with NaBH<sub>4</sub> (5 mg/ml). Radiolabeled lipids were extracted by using a  
374 modified Bligh and Dyer's method, dissolved in CHCl<sub>3</sub> and analyzed by thin-layer  
375 chromatography.

376

377 **Western Blot analysis.** RIPA buffer cell lysates were analyzed with sodium dodecyl  
378 sulfate–polyacrylamide gel electrophoresis (SDS–PAGE) and immunoblotting, as  
379 previously reported <sup>19</sup>. The following primary antibodies were used for WB analysis: S1P1  
380 (ABclonal, #A12935); ORMDL3 (Millipore, #ABN417); NOGO-B (SCBT, #sc-11027);  
381 SPTCL1 and eNOS (BD Biosciences, #611305 and (#610297, respectively); SPTLC2  
382 (ABclonal, #A11716); HA, Ubiquitin-K48, P-IR (Y1150/1151), IR, P-VEGFR2 (Y1175),  
383 VEGFR2, P-eNOS (S1177), P-AKT (S473), and AKT (Cell Signaling Technology, #3724,  
384 #4289, #3024, #3020, #2478, #2479, #9571, #4058, and #2920, respectively); β-ACTIN  
385 (ThermoFisher Scientific, #AM4302).

386

387 **Phosphorylation analysis by phosphate-affinity SDS–PAGE.** RIPA buffer EDTA-free  
388 cell lysates were loaded in a SDS–PAGE gels with prepared with 50mM MnCl<sub>2</sub> and 25mM  
389 phosphate affinity reagent (ApexBio, #F4002)<sup>62</sup>. Gels were run at 100V for 2h, rinsed  
390 three time for 10min in transfer buffer with 1mM EDTA before transfer to nitrocellulose  
391 membranes.

392

393 **Knockdown by siRNA transfection.** siRNA targeting Nogo-B (sense: 5'-  
394 GACUGGAGUGGUGUUUGGUUU-3', antisense: 5'-ACCAAACACCACUCCAGUCUU-  
395 3'); ORMDL1 (sense: 5'-CUCAUUGGGAACAACUGGAUU-3', antisense: 5'-

396 UCCAGUUGUUCCTCAAUGAGUU-3'); ORMDL2 (sense: 5'-CUUCCUUCAUACGGUGAA  
397 AUU-3', antisense: 5'-UUUCACCGUAUGAAGGAAGUU-3'); ORMDL3 (sense: 5'-  
398 UUCUACACUAAGUACGACCUU-3', antisense: 5'-GGUCGUACUUAGUGUAGAAUU-  
399 3'); S1P3 (sense: 5'-GCUCCAGUAACAACAGCAGUU-3', antisense: 5'-  
400 CUGCUGUUGUUACUGGAGCUU-3'), and control (sense: 5'-  
401 UUCUCCGAACGUGUCACG-3', antisense: 5'-ACGUGACACGUUCGGAGAA-3') were  
402 synthesized by Dharmacon. HUVEC or murine EC were transfected with 40nM of siRNA  
403 using DharmaFECT 4 transfection reagent (Dharmacon, #T-2004). mRNA or protein  
404 expression and relative assays were performed 72h after transfection.

405

406 **Real-time PCR (RT-PCR) analysis of murine EC.** Total RNA from EC in culture was  
407 extracted according to the TRIzol reagent protocol (ThermoFisher Scientific, #15596026).  
408 Maxima First Strand cDNA Synthesis Kit (ThermoFisher Scientific, #K1641) was used for  
409 the reverse transcription of 100ng of RNA. For RT-PCR analysis PowerUp™ SYBR™  
410 Green Master Mix (ThermoFisher Scientific, #A25779) and Applied Biosystems 7500 Fast  
411 RT PCR system were used. Primers set were: SphK1 (5'-  
412 AGGTGGTGAATGGGCTAATG-3' and 5'-TGCTCGTACCCAGCATAGTG-3'); SphK2 (5'-  
413 TGGTGCCAATGATCTCTGAA-3' and 5'-CCAGACACAGTGACAATGCC-3'); ORMDL1  
414 (5'-CATAGCCGGTTGAAGCAGAC-3' and 5'-ACGTTGACTCAGAGCCTTGA-3');  
415 ORMDL2 (5'-CCAAGTACGATGCTGCTCAC-3' and 5'-TTCCAGTGCCTTCCCTCAAT-  
416 3'); ORMDL3 (5'-ACTGAGGTTGTAGCCCCTTC-3' and 5'-  
417 ACCCTAACCCCACTACAAGC-3'); S1PR3 (5'-GCTTCATCGTCTTGGAGAACCTG-3'  
418 and 5'-CAGAGAGCCAAGTTGCCGATGA-3'); Spns2 (5'-

419 AGAAGCCGCATCCTCAGTTAGC-3' and 5'-CAGGCCAGAATCTCCCCAAATC-3'); 18S  
420 (5'-TTCCGATAACGAACGAGACTCT-3' and 5'-TGGCTGAACGCCACTTGTC-3'). Gene  
421 of interest relative mRNA expression was calculated with the  $2(-\Delta\Delta Ct)$  method, using 18S  
422 as housekeeping<sup>63</sup>.

423

424 **Lentivirus construction.** Human HA-tagged ORMDL3 (NCBI AAM43507.1) and the  
425 mutant P137A were synthesized by Genewiz and inserted in the lentiviral vector pCDH-  
426 CMV-MCS-EF1-Puro (Addgene). Lentiviral particles containing the construct encoding  
427 HA-ORMDL3-WT and HA-ORMDL3-P137A were produced in HEK293T cells transfected  
428 with Calcium Phosphate technique. Viral particles were harvested from the culture  
429 supernatant 72h after transfection, passed through a 0.45 $\mu$ m filter and concentrated by  
430 adding a virus precipitation solution (40% PEG8000 and 2.5M NaCl) overnight at 4 °C,  
431 followed by centrifugation at 1,500 $\times$ g for 30min. Viral pellets were resuspended in DMEM  
432 and stored at -80 °C until use.

433

434 **Immunoprecipitation.** To assess ubiquitination, 293T cells were co-transfected with  
435 plasmid expressing Ub-GFP (gift from Nico Dantuma (Addgene plasmid # 11928;  
436 <http://n2t.net/addgene:11928>; RRID:Addgene\_11928)) and HA-ORMDL3-WT or HA-  
437 ORMDL3-P137A. After 48h, cells were lysed and HA-ORMDL3 was immunoprecipitated  
438 with antibody against HA (Cell Signaling Technology, #3724) in modified RIPA buffer (50  
439 mM Tris-HCl pH 7.2, 0.9% NaCl, 5.0 mM NaF, 1.0 mM Na<sub>3</sub>VO<sub>4</sub>, 1% NP40, and protease  
440 inhibitors) at 4°C o.n. The immune

441 complexes were precipitated with Dynabeads protein G (#10003D, Invitrogen, for 1.5h at  
442 4°C) and size-fractionated on SDS-PAGE gels. Ubiquitin was detected with Ubiquitin-K48  
443 antibody (Cell Signaling Technology, #4289).

444

445 **Microsomal isolation from mouse lung.** Microsomal fractions were obtained from  
446 Spns2<sup>ff</sup> and Spns2<sup>ECKO</sup> lungs as previously described<sup>3</sup>. Briefly, lungs were homogenized  
447 with liquid nitrogen in microsomal preparation buffer (50mM HEPES pH 7.4, 0.25M  
448 sucrose, and 5mM EDTA). The homogenates were centrifuged for 15min at 18,000×g at  
449 4°C, and the resulting supernatants were ultracentrifuged for 1h at 100,000×g at 4°C. The  
450 microsomal pellets were then resuspended by adding 0.25ml of SPT reaction buffer.

451

452 **Measurement of Sphingolipid Flux using Stable Isotopes.** Confluent EC were  
453 switched to DMEM lacking L-Serine for 2hrs. The cells were then switched to DMEM  
454 containing 0.45mM L-serine-<sup>13</sup>C<sub>3</sub>, <sup>15</sup>N (Sigma, #608130) and 300μM palmitate, with or  
455 without 300nM S1P for 3h. The reaction was thereafter washed with PBS, trypsinized and  
456 the cell pellet stored at -80°C. Lipids were thereafter extracted and total and labeled  
457 sphingolipids analyzed by mass-spectrometry at the University of Utah metabolomics  
458 core, as previously described<sup>64</sup>.

459

460 **Flow cytometric determination of apoptosis by Annexin V/Propidium Iodide**  
461 **staining.** Cells were analyzed for phosphatidylserine exposure by an Annexin-V  
462 FITC/Propidium Iodide double-staining method, according to manufacturer instruction  
463 (Abcam, #ab14085). Spns2<sup>ff</sup> and Spns2<sup>ECKO</sup> cells were treated with vehicle or C6:0-



464 ceramide (30 $\mu$ M, 8h; Avanti, #860506 ), stained, acquired with BD FACSymphony Flow  
465 Cytometer, and analyzed with FlowJo software.

466

467 **Vascular reactivity studies.** At 2 weeks post-tamoxifen treatment, second order  
468 mesenteric arteries (MA) were harvested, cleaned from adhering tissue and mounted on  
469 glass micropipettes in a wire myograph chamber (Danish MyoTechnology, Aarhus,  
470 Denmark). Vessels were maintained in Krebs solution<sup>3,19</sup>. MA were equilibrated for 15  
471 min at 80 mmHg, pre-constricted with PE (1 $\mu$ M) and a cumulative concentration-response  
472 curve of Ach (0.1nM-30 $\mu$ M) was performed to evaluate the endothelial function. The  
473 following concentration-response curves were performed: insulin (pU/mL-3 $\mu$ U/mL),  
474 VEGF (1 $\mu$ g/ml-30mg/ml), and sodium nitroprussiate (SNP, 10nM-30 $\mu$ M). Were indicated,  
475 mice were treated with myriocin 0.3mg/Kg i.p. for two consecutive days before the  
476 experiment.

477

478 **Seahorse.** Oxygen consumption rate (OCR) and extracellular acidification rate (ECAR)  
479 was measured with a XF96 Extracellular Flux Analyzer (Agilent Technologies, Santa  
480 Clara, CA, USA). mEC were plated a density of  $1.5 \times 10^4$  cells/well in 200 $\mu$ l of DMEM and  
481 incubated for 24h at 37°C in 5% CO<sub>2</sub>. After replacing the growth medium with 200 $\mu$ l of XF  
482 Assay Medium (Seahorse Bioscience, 103575-100) supplemented with 5mM glucose,  
483 1mM pyruvate and 2mM GlutaMAX (Gibco), pre-warmed at 37°C, cells were preincubated  
484 for 1h before starting the assay procedure. OCR and ECAR were recorded at baseline,  
485 in the presence of 1 $\mu$ M oligomycin, 2 $\mu$ M carbonyl cyanide 4-  
486 trifluoromethoxyphenylhydrazone (FCCP), 0.5 $\mu$ M Antimycin A (AA) plus 0.5 $\mu$ M Rotenon

487 (Rot) and in the presence of 25mM 2-Deoxy-D-glucose sequentially. Non-mitochondrial  
488 respiration (in the presence of AA+Rot) was subtracted from all rates. Following the  
489 experiment cell nuclei were stained with 1 $\mu$ M Hoechst 33342 (Thermo), imaged with an  
490 ImageXpress pico (Molecular Devices, San Jose, CA, USA) and counted. OCR and  
491 ECAR were normalized by the cell counts. Respiratory and glycolysis parameters were  
492 quantified by subtracting respiration rates at times before and after the addition of electron  
493 transport chain inhibitors according to Seahorse Bioscience. Basal respiration: baseline  
494 respiration minus (AA+Rot)-dependent respiration; H<sup>+</sup> leak, Oligo-dependent respiration  
495 minus (AA+Rot)-dependent respiration; ATP turnover, baseline respiration minus oligo-  
496 dependent respiration; Max respiratory capacity: FCCP–dependent respiration minus  
497 (AA+Rot)-dependent respiration; Spare capacity: Max respiratory capacity minus Basal  
498 respiration. Basal glycolysis: basal ECAR minus non-glycolitic acidification; Glycolitic  
499 capacity: maximal ECAR after oligo minus non-glycolitic acidification.

500

501 **Mitochondrial membrane potential and morphology.** For the measurements of  
502 mitochondrial membrane potential number, mEC were seeded at the density of  $2 \times 10^3$   
503 cells/well in a 96-well glass bottom tissue culture plate (Cellvis P96-1.5H-N) in 200 $\mu$ L of  
504 DMEM and incubated for 24h at 37°C in 5% CO<sub>2</sub>. Cells were loaded with 15nM  
505 tetramethylrhodamine methyl ester (TMRM, 544ex; 590em, Life Technologies) and 1 $\mu$ M  
506 Hoechst 33342 for 30 minutes at 37°C in Krebs buffer. TMRM and Hoechst fluorescence  
507 were imaged with an ImageXpress pico. Subsequently 5 $\mu$ M FCCP was added to record  
508 background fluorescence. ~50 cells were segmented manually using ImageJ.

509 Background TMRM fluorescence was subtracted from baseline fluorescence.  
510 Mitochondria were segmented and counted in each cell using adaptive thresholding.

511

## 512 **Statistical Analysis**

513 Two-way ANOVA with Tukey's post-test, or Student *t* test were used for the statistical  
514 analysis as indicated in figure legends. Differences were considered statistically  
515 significant when  $P < 0.05$ . GraphPad Prism software (version 9.0, GraphPad Software,  
516 San Diego, CA) was used for all statistical analysis.

517

## 518 **Figure Legends**

519 **Figure 1. S1P inhibits SPT activity via ORMDLs stabilization. (A)** SPT activity and  
520 Western blot (WB) analysis of S1PR1 in S1pr1<sup>ff</sup> and S1pr1<sup>ECKO</sup> endothelial cells after 4-  
521 OHT (1 $\mu$ M, 72h) treatment. (n=8/group from 3 independent EC isolations/group; 4  
522 mice/EC isolation). LC- MS/MS quantification of Total **(B)** Ceramide and **(C)**  
523 Glucosylceramide in S1pr1<sup>ff</sup> and S1Pr1<sup>ECKO</sup> endothelial cells after 4-OHT (1 $\mu$ M, 72h)  
524 treatment (n=5/group from 2 independent EC isolations/group; 4 mice/EC isolation). SPT  
525 activity in HUVEC in **(D)** absence or presence of S1P (300nM, 30') (n=6); **(E)** absence of  
526 presence of C16:0-ceramide (300nM, 30') and **(F)** absence of presence of C16:0-  
527 ceramide (300nM, 30'), in presence of SKI II (1 $\mu$ M, 1h pre-treatment). **(G)** RT-PCR for  
528 SphK1 and SphK2 in endothelial cells SphK1,2<sup>ff</sup> and SphK1,2<sup>ECKO</sup> after 4-OHT (1 $\mu$ M,  
529 72h) treatment (n=4/group). **(H)** SPT activity in SphK1,2<sup>ff</sup> and SphK1,2<sup>ECKO</sup> after 4-OHT  
530 (1 $\mu$ M, 72h) treatment in absence or presence of S1P (300nM, 30') or C16:0-ceramide  
531 (300nM, 30') (n $\geq$ 5/group from 3 independent EC isolations/group; 4 mice/EC isolation).

532 **(I)** WB analysis of ORMDLs, NOGO-B, SPTLC1 and SPTLC2 in HUVEC lysates in  
533 absence or presence of S1P (300nM, 30') and **(L)** relative ORMDLs quantification. **(M)**  
534 WB analysis of ORMDLs, SPTLC1 and SPTLC2 in HUVEC lysates in absence or  
535 presence of C16:0-ceramide (300nM, 30'), with or without SKI II 1µM, 1h pre-treatment).  
536 SPT activity and WB analysis of HUVEC treated with **(N)** siCTRL and siNOGO (40nM,  
537 72h) (n≥4/group), or with **(O)** siCTRL and siORMDL1/2/3 (40nM, 72h) (n=4/group). **(P)**  
538 Graphical abstract. β-ACTIN, loading control. <sup>3</sup>[H]-serine and palmitoyl-CoA were used  
539 as substrates for SPT activity. Sphinganine - the reaction product – was separated in TLC  
540 (thin-layer chromatography) and quantified. Where not indicated, data are representative  
541 of two or more independent experiments. Data are expressed as mean±SEM. \*P≤0.05;  
542 \*\*P≤0.01; \*\*\*P≤0.001. Statistical significance was determined by unpaired t-test **(A-G, L)**,  
543 and 2-way ANOVA with Tukey's post-test **(H, N, O)**.

544

545 **Figure 2. ORMDLs are degraded via PHD-mediated ubiquitination and proteasomal**  
546 **degradation. (A)** WB analysis of ORMDL3 (HA), SPTLC1 and SPTLC2 in HUVEC  
547 lysates expressing HA-ORMDL3 and treated with cycloheximide (CHX, 10µM) for the  
548 indicated period of time. **(B)** Prolyl hydroxylase consensus sequence in the three ORMDL  
549 isoforms. **(C-E)** WB analysis of ORMDLs, SPTLC1 and SPTLC2 in HUVEC lysates in  
550 absence or presence of S1P (300nM, 30') and with or without **(C)** DMOG (1mM, 1h pre-  
551 treatment), **(D)** Eeyarestatin 1 (EER1, 10µM, 1h pre-treatment), **(E)** MG132 (10µM, 1h  
552 pre-treatment). **(F)** WB analysis of HA-ORMDL3 and HA-ORMDL3-P137A in HUVEC  
553 lysates in absence or presence of S1P (300nM, 30'), DMOG (1mM, 1h), EER1 (10µM,  
554 1h), and MG132 (10µM, 1h). **(G)** WB analysis of HA-ORMDL3 and HA-ORMDL3-P137A,

555 SPTLC1 and SPTLC2 in HUVEC lysates treated with CHX (10 $\mu$ M) for the indicated period  
556 of time, and **(H)** relative quantification. **(I)** WB analysis for GFP and HA of HEK293T  
557 transfected with GFP-ubiquitin and with the indicated HA-ORMDL3 plasmid, and  
558 immunoprecipitated with HA antibody. **(L)** SPT activity in HUVEC expressing the  
559 ORMDL3 or ORMDL3-P137A, and depleted of endogenous ORMDLs with siRNA, in  
560 absence or presence of S1P (300nM, 30') (n $\geq$ 4/group). **(M)** Graphical abstract.  $\beta$ -ACTIN,  
561 loading control.  $^3$ [H]-serine and palmitoyl-CoA were used as substrates for SPT activity.  
562 Sphinganine - the reaction product – was separated in TLC (thin-layer chromatography)  
563 and quantified. Where not indicated, data are representative of two or more independent  
564 experiments. Data are expressed as mean $\pm$ SEM. \* $P\leq$ 0.05; \*\* $P\leq$ 0.01; \*\*\* $P\leq$ 0.001.  
565 Statistical significance was determined by 2-way ANOVA with Tukey's post-test.

566

567 **Figure 3. Endothelial-derived S1P inhibits de novo sphingolipid biosynthesis via**  
568 **S1PRs. (A)** SPT activity in S1pr1,3<sup>ff</sup> and S1pr1,2<sup>ECKO</sup> after 4-OHT (1 $\mu$ M, 72h) and  
569 siS1PR3 (40nM, 72h) treatments, in absence or presence of S1P (300nM, 30') (n $\geq$ 4/group  
570 from 2 independent EC isolations/group; 4 mice/EC isolation) and **(B)** relative WB  
571 analysis for S1PR1, ORMDL, P-AKT and AKT. LC- MS/MS quantification of Total **(C)**  
572 Ceramide and **(D)** Glucosylceramide in S1pr1,3<sup>ff</sup> and S1Pr1,3<sup>ECKO</sup> endothelial cells after  
573 4-OHT and siS1PR3 treatment (n $\geq$ 3/group from 2 independent EC isolations/group; 4  
574 mice/EC isolation). **(E)** Experimental procedure for the measurement of the *de novo*  
575 synthesized Ceramides and Glucosylceramides. LC- MS/MS quantification of **(F)** total and  
576 **(G)** specific Ceramides, and of **(H)** total and **(I)** specific Glucosylceramides labeled with  
577 L-Serine- $^{13}$ C $_3$ ,  $^{15}$ N in absence or presence of S1P (300nM). **(L)** RT-PCR for Spns2 in

578 endothelial cells Spns2<sup>ff</sup> and Spns2<sup>ECKO</sup> after 4-OHT (1 $\mu$ M, 72h) treatment (n=4/group).  
579 **(M)** SPT activity in Spns2<sup>ff</sup> and Spns2<sup>ECKO</sup> after 4-OHT, in absence or presence of S1P  
580 (300nM, 30') (n $\geq$ 3/group from 2 independent EC isolations/group; 4 mice/EC isolation)  
581 and **(N)** relative WB analysis for ORMDL. LC- MS/MS quantification of Total **(O)** Ceramide  
582 and **(P)** Glucosylceramide in Spns2<sup>ff</sup> and Spns2<sup>ECKO</sup> endothelial cells after 4-OHT  
583 (n=5/group from 2 independent EC isolations/group; 4 mice/EC isolation). **(Q)** SPT activity  
584 in microsomes from lung of Spns2<sup>ff</sup> and Spns2<sup>ECKO</sup> mice (n=5/group). LC- MS/MS  
585 quantification of **(R)** total and **(S)** specific Ceramides, and of **(T)** total and **(U)** specific  
586 Glucosylceramides labeled with L-Serine-<sup>13</sup>C<sub>3</sub>, <sup>15</sup>N in absence or presence of S1P  
587 (300nM).  $\beta$ -ACTIN, loading control. <sup>3</sup>[H]-serine and palmitoyl-CoA were used as  
588 substrates for SPT activity. Sphinganine - the reaction product – was separated in TLC  
589 (thin-layer chromatography) and quantified. Where not indicated, data are representative  
590 of two or more independent experiments. Data are expressed as mean $\pm$ SEM. \* $P\leq$ 0.05;  
591 \*\* $P\leq$ 0.01; \*\*\* $P\leq$ 0.001. Statistical significance was determined by unpaired t-test (**C, D, L,**  
592 **O-Q**), and 2-way ANOVA with Tukey's post-test (**A, F-I, M, R-U**).

593

594 **Figure 4. Ceramide accrual leads to endothelial and mitochondrial dysfunction. (A)**  
595 WB analysis of P-VEGFR2 (Y1175), VEGFR2, P-IR (Y1150/1151), IR, P-AKT (S473),  
596 AKT, P-eNOS (S1176), and eNOS in Spns2<sup>ff</sup> and Spns2<sup>ECKO</sup> endothelial cells lysates in  
597 absence or presence of VEGF (100ng/mL, 2') or Insulin (1U/mL, 2') and **(B-C)** relative  
598 quantification of the indicated phospho/total protein ratios. Vasodilation in response to **(D)**  
599 VEGF, **(E)** Insulin, **(F)** Acetylcholine, and **(G)** SNP (Spns2<sup>ff</sup>, n=3; Spns2<sup>ECKO</sup>, n=3;  
600 Spns2<sup>ECKO</sup> + Myo, n=4). **(H)** Representative curves of OCR and **(I)** quantification of OCR

601 metrics in Spns2<sup>ff</sup> and Spns2<sup>ECKO</sup> mEC. Oligomycin (Oligo), uncoupler FCCP, rotenone  
602 and antimycin A (Rot/AA) were added at the indicated times. **(L)** Representative curves  
603 of ECAR and **(M)** quantification of ECAR metrics in Spns2<sup>ff</sup> and Spns2<sup>ECKO</sup> mEC.  
604 Oligomycin (Oligo), uncoupler FCCP, rotenone and antimycin A (Rot/AA) were added at  
605 the indicated times. **(N)** TMRM fluorescence, **(O)** mitochondrial area, and **(P)** number of  
606 mitochondria per cells, as quantified by TMRM and Hoechst fluorescence. **(Q)**  
607 Representative dot-plot diagrams and **(R)** relative quantification of Spns2<sup>ff</sup> and  
608 Spns2<sup>ECKO</sup> mEC, in absence or presence of Palmitate (300μM, 16h), stained with Annexin  
609 V and analyzed by FACS. Where not indicated, data are representative of two or more  
610 independent experiments. Data are expressed as mean±SEM. \* $P\leq 0.05$ ; \*\* $P\leq 0.01$ ;  
611 \*\*\* $P\leq 0.001$ ; °°° $P\leq 0.001$ . \*Spns2<sup>ff</sup> vs. Spns2<sup>ECKO</sup>, °Spns2<sup>ECKO</sup> vs. Spns2<sup>ECKO</sup> + Myo.  
612 Statistical significance was determined by 2-way ANOVA with Tukey's post-test (**D-G, I,**  
613 **M, R**) and unpaired t-test (**N, O, P**).

614

## 615 DATA SOURCE

616 Figure 1 – Source Data 1: Uncropped western blot images

617 Figure 1 – Source Data 2: Ceramide and Glucosylceramide measurement in S1pr1<sup>ff</sup> and

618 S1pr1<sup>ECKO</sup> endothelial cells

619 Figure 2 – Source Data 1: Uncropped western blot images

620 Figure 3 – Source Data 1: Uncropped western blot images

621 Figure 3 – Source Data 2: Ceramide and Glucosylceramide measurement in S1pr1,3<sup>ff</sup>

622 and S1pr1,3<sup>ECKO</sup> endothelial cells

623 Figure 3 – Source Data 3: Ceramide and Glucosylceramide measurement in Spns2<sup>ff</sup> and  
624 Spns2<sup>ECKO</sup> endothelial cells

625 Figure 4 – Source Data 1: Uncropped western blot images

626 Supplementary Figure 4 – Source Data 1: Ceramide and Glucosylceramide measurement  
627 in S1pr1,3<sup>ff</sup> and S1pr3<sup>ECKO</sup> endothelial cells

628 Supplementary Figure 5 – Source Data 1: Ceramide and Glucosylceramide measurement  
629 in S1pr1,3<sup>ff</sup> and S1pr1,3<sup>ECKO</sup> endothelial cells

630 Supplementary Figure 5 – Source Data 2: Ceramide and Glucosylceramide measurement  
631 in Spns2<sup>ff</sup> and Spns2<sup>ECKO</sup> endothelial cells

632

633

## 634 REFERENCES

- 635 1. Han, G., *et al.* Identification of small subunits of mammalian serine palmitoyltransferase  
636 that confer distinct acyl-CoA substrate specificities. *Proc Natl Acad Sci U S A* **106**, 8186-  
637 8191 (2009).
- 638 2. Breslow, D.K., *et al.* Orm family proteins mediate sphingolipid homeostasis. *Nature* **463**,  
639 1048-1053 (2010).
- 640 3. Cantalupo, A., *et al.* Nogo-B regulates endothelial sphingolipid homeostasis to control  
641 vascular function and blood pressure. *Nat Med* **21**, 1028-1037 (2015).
- 642 4. Dawkins, J.L., Hulme, D.J., Brahmbhatt, S.B., Auer-Grumbach, M. & Nicholson, G.A.  
643 Mutations in SPTLC1, encoding serine palmitoyltransferase, long chain base subunit-1,  
644 cause hereditary sensory neuropathy type I. *Nat Genet* **27**, 309-312 (2001).
- 645 5. Roththier, A., *et al.* Mutations in the SPTLC2 subunit of serine palmitoyltransferase cause  
646 hereditary sensory and autonomic neuropathy type I. *Am J Hum Genet* **87**, 513-522  
647 (2010).
- 648 6. Moffatt, M.F., *et al.* Genetic variants regulating ORMDL3 expression contribute to the  
649 risk of childhood asthma. *Nature* **448**, 470-473 (2007).
- 650 7. Ma, X., *et al.* ORMDL3 contributes to the risk of atherosclerosis in Chinese Han  
651 population and mediates oxidized low-density lipoprotein-induced autophagy in  
652 endothelial cells. *Sci Rep* **5**, 17194 (2015).



- 653 8. Hojjati, M.R., Li, Z. & Jiang, X.C. Serine palmitoyl-CoA transferase (SPT) deficiency and  
654 sphingolipid levels in mice. *Biochim Biophys Acta* **1737**, 44-51 (2005).
- 655 9. Hjelmqvist, L., *et al.* ORMDL proteins are a conserved new family of endoplasmic  
656 reticulum membrane proteins. *Genome Biol* **3**, RESEARCH0027 (2002).
- 657 10. Cartier, A. & Hla, T. Sphingosine 1-phosphate: Lipid signaling in pathology and therapy.  
658 *Science* **366**(2019).
- 659 11. Liu, Y., *et al.* Edg-1, the G protein-coupled receptor for sphingosine-1-phosphate, is  
660 essential for vascular maturation. *J Clin Invest* **106**, 951-961 (2000).
- 661 12. Yanagida, K. & Hla, T. Vascular and Immunobiology of the Circulatory Sphingosine 1-  
662 Phosphate Gradient. *Annu Rev Physiol* **79**, 67-91 (2017).
- 663 13. Rivera, J., Proia, R.L. & Olivera, A. The alliance of sphingosine-1-phosphate and its  
664 receptors in immunity. *Nat Rev Immunol* **8**, 753-763 (2008).
- 665 14. Cantalupo, A. & Di Lorenzo, A. S1P Signaling and De Novo Biosynthesis in Blood  
666 Pressure Homeostasis. *J Pharmacol Exp Ther* **358**, 359-370 (2016).
- 667 15. Cantalupo, A., *et al.* S1PR1 (Sphingosine-1-Phosphate Receptor 1) Signaling Regulates  
668 Blood Flow and Pressure. *Hypertension* **70**, 426-434 (2017).
- 669 16. Galvani, S., *et al.* HDL-bound sphingosine 1-phosphate acts as a biased agonist for the  
670 endothelial cell receptor S1P1 to limit vascular inflammation. *Sci Signal* **8**, ra79 (2015).
- 671 17. Obinata, H. & Hla, T. Sphingosine 1-phosphate and inflammation. *Int Immunol* **31**, 617-  
672 625 (2019).
- 673 18. Burg, N., Swendeman, S., Worgall, S., Hla, T. & Salmon, J.E. Sphingosine 1-Phosphate  
674 Receptor 1 Signaling Maintains Endothelial Cell Barrier Function and Protects Against  
675 Immune Complex-Induced Vascular Injury. *Arthritis Rheumatol* **70**, 1879-1889 (2018).
- 676 19. Cantalupo, A., *et al.* Endothelial Sphingolipid De Novo Synthesis Controls Blood  
677 Pressure by Regulating Signal Transduction and NO via Ceramide. *Hypertension*  
678 (2020).
- 679 20. Venkataraman, K., *et al.* Vascular Endothelium As a Contributor of Plasma Sphingosine  
680 1-Phosphate. *Circulation Research* **102**, 669-676 (2008).
- 681 21. Hisano, Y., Kobayashi, N., Yamaguchi, A. & Nishi, T. Mouse SPNS2 Functions as a  
682 Sphingosine-1-Phosphate Transporter in Vascular Endothelial Cells. *PLoS ONE* **7**,  
683 e38941-e38941 (2012).
- 684 22. Jacob, M., Chappell, D. & Becker, B.F. Regulation of blood flow and volume exchange  
685 across the microcirculation. *Crit Care* **20**, 319 (2016).
- 686 23. Del Gaudio, I., *et al.* Endothelial Spns2 and ApoM Regulation of Vascular Tone and  
687 Hypertension Via Sphingosine-1-Phosphate. *J Am Heart Assoc*, e021261 (2021).

- 688 24. Davis, D.L., Gable, K., Suemitsu, J., Dunn, T.M. & Wattenberg, B.W. The ORMDL/Orm-  
689 serine palmitoyltransferase (SPT) complex is directly regulated by ceramide:  
690 Reconstitution of SPT regulation in isolated membranes. *J Biol Chem* **294**, 5146-5156  
691 (2019).
- 692 25. Gupta, S.D., *et al.* Expression of the ORMDLS, modulators of serine  
693 palmitoyltransferase, is regulated by sphingolipids in mammalian cells. *J Biol Chem* **290**,  
694 90-98 (2015).
- 695 26. Siow, D.L. & Wattenberg, B.W. Mammalian ORMDL proteins mediate the feedback  
696 response in ceramide biosynthesis. *J Biol Chem* **287**, 40198-40204 (2012).
- 697 27. Hipp, M.S., Kasturi, P. & Hartl, F.U. The proteostasis network and its decline in ageing.  
698 *Nat Rev Mol Cell Biol* **20**, 421-435 (2019).
- 699 28. Jaakkola, P., *et al.* Targeting of HIF-alpha to the von Hippel-Lindau ubiquitylation  
700 complex by O2-regulated prolyl hydroxylation. *Science* **292**, 468-472 (2001).
- 701 29. Yu, M., *et al.* The non-canonical functions of HIF prolyl hydroxylases and their dual roles  
702 in cancer. *Int J Biochem Cell Biol* **135**, 105982 (2021).
- 703 30. Dederer, V. & Lemberg, M.K. Transmembrane dislocases: a second chance for protein  
704 targeting. *Trends Cell Biol* (2021).
- 705 31. Pickart, C.M. Targeting of substrates to the 26S proteasome. *FASEB J* **11**, 1055-1066  
706 (1997).
- 707 32. Swatek, K.N. & Komander, D. Ubiquitin modifications. *Cell Res* **26**, 399-422 (2016).
- 708 33. Lee, M.J., *et al.* Vascular endothelial cell adherens junction assembly and  
709 morphogenesis induced by sphingosine-1-phosphate. *Cell* **99**, 301-312 (1999).
- 710 34. Kolesnick, R.N., Goni, F.M. & Alonso, A. Compartmentalization of ceramide signaling:  
711 physical foundations and biological effects. *J Cell Physiol* **184**, 285-300 (2000).
- 712 35. Pinto, S.N., Silva, L.C., Futerman, A.H. & Prieto, M. Effect of ceramide structure on  
713 membrane biophysical properties: the role of acyl chain length and unsaturation.  
714 *Biochim Biophys Acta* **1808**, 2753-2760 (2011).
- 715 36. Simons, K. & Toomre, D. Lipid rafts and signal transduction. *Nat Rev Mol Cell Biol* **1**, 31-  
716 39 (2000).
- 717 37. Symons, J.D. & Abel, E.D. Lipotoxicity contributes to endothelial dysfunction: a focus on  
718 the contribution from ceramide. *Rev Endocr Metab Disord* **14**, 59-68 (2013).
- 719 38. Corda, S., Laplace, C., Vicaut, E. & Duranteau, J. Rapid reactive oxygen species  
720 production by mitochondria in endothelial cells exposed to tumor necrosis factor-alpha is  
721 mediated by ceramide. *Am J Respir Cell Mol Biol* **24**, 762-768 (2001).
- 722 39. Kogot-Levin, A. & Saada, A. Ceramide and the mitochondrial respiratory chain.  
723 *Biochimie* **100**, 88-94 (2014).

- 724 40. Dadsena, S., Hassan, D.G. & Holthuis, J.C.M. Unraveling the molecular principles by  
725 which ceramides commit cells to death. *Cell Stress* **3**, 280-283 (2019).
- 726 41. Choi, R.H., Tatum, S.M., Symons, J.D., Summers, S.A. & Holland, W.L. Ceramides and  
727 other sphingolipids as drivers of cardiovascular disease. *Nat Rev Cardiol* (2021).
- 728 42. Sasset, L., Zhang, Y., Dunn, T.M. & Di Lorenzo, A. Sphingolipid De Novo Biosynthesis:  
729 A Rheostat of Cardiovascular Homeostasis. *Trends Endocrinol Metab* **27**, 807-819  
730 (2016).
- 731 43. Sattler, K., *et al.* HDL-Bound Sphingosine 1-Phosphate (S1P) Predicts the Severity of  
732 Coronary Artery Atherosclerosis. *Cellular Physiology and Biochemistry* **34**, 172-184  
733 (2014).
- 734 44. Sattler, K.J.E., *et al.* Sphingosine 1-phosphate levels in plasma and HDL are altered in  
735 coronary artery disease. *Basic Research in Cardiology* **105**, 821-832 (2010).
- 736 45. Knapp, M., *et al.* Plasma sphingosine-1-phosphate concentration is reduced in patients  
737 with myocardial infarction. *Med Sci Monit* **15**, CR490-493 (2009).
- 738 46. Ji, R., *et al.* Increased de novo ceramide synthesis and accumulation in failing  
739 myocardium. *JCI Insight* **2**(2017).
- 740 47. Yu, J., *et al.* Ceramide is upregulated and associated with mortality in patients with  
741 chronic heart failure. *Can J Cardiol* **31**, 357-363 (2015).
- 742 48. Spijkers, L.J., *et al.* Hypertension is associated with marked alterations in sphingolipid  
743 biology: a potential role for ceramide. *PLoS One* **6**, e21817 (2011).
- 744 49. Haus, J.M., *et al.* Plasma ceramides are elevated in obese subjects with type 2 diabetes  
745 and correlate with the severity of insulin resistance. *Diabetes* **58**, 337-343 (2009).
- 746 50. Wigger, L., *et al.* Plasma Dihydroceramides Are Diabetes Susceptibility Biomarker  
747 Candidates in Mice and Humans. *Cell Rep* **18**, 2269-2279 (2017).
- 748 51. Miller, M., *et al.* ORMDL3 is an inducible lung epithelial gene regulating  
749 metalloproteases, chemokines, OAS, and ATF6. *Proc Natl Acad Sci U S A* **109**, 16648-  
750 16653 (2012).
- 751 52. Zhang, Y., *et al.* Endothelial Nogo-B regulates sphingolipid biosynthesis to promote  
752 pathological cardiac hypertrophy during chronic pressure overload. *JCI Insight* **1**(2016).
- 753 53. Shendre, A., *et al.* Local Ancestry and Clinical Cardiovascular Events Among African  
754 Americans From the Atherosclerosis Risk in Communities Study. *J Am Heart Assoc*  
755 **6**(2017).
- 756 54. Obinata, H., *et al.* Individual variation of human S1P(1) coding sequence leads to  
757 heterogeneity in receptor function and drug interactions. *J Lipid Res* **55**, 2665-2675  
758 (2014).

- 759 55. Kappos, L., *et al.* Oral fingolimod (FTY720) for relapsing multiple sclerosis. *N Engl J Med*  
760 **355**, 1124-1140 (2006).
- 761 56. Allende, M.L., Yamashita, T. & Proia, R.L. G-protein-coupled receptor S1P1 acts within  
762 endothelial cells to regulate vascular maturation. *Blood* **102**, 3665-3667 (2003).
- 763 57. Xiong, Y., *et al.* Sphingosine Kinases Are Not Required for Inflammatory Responses in  
764 Macrophages. *Journal of Biological Chemistry* **288**, 32563-32573 (2013).
- 765 58. Mendoza, A., *et al.* The transporter Spns2 is required for secretion of lymph but not  
766 plasma sphingosine-1-phosphate. *Cell Rep* **2**, 1104-1110 (2012).
- 767 59. Wang, Y., *et al.* Ephrin-B2 controls VEGF-induced angiogenesis and  
768 lymphangiogenesis. *Nature* **465**, 483-486 (2010).
- 769 60. Gao, P., Peterson, Y.K., Smith, R.A. & Smith, C.D. Characterization of isoenzyme-  
770 selective inhibitors of human sphingosine kinases. *PLoS One* **7**, e44543 (2012).
- 771 61. Wang, Q., *et al.* The ERAD inhibitor Eeyarestatin I is a bifunctional compound with a  
772 membrane-binding domain and a p97/VCP inhibitory group. *PLoS One* **5**, e15479  
773 (2010).
- 774 62. Kinoshita, E., Kinoshita-Kikuta, E., Takiyama, K. & Koike, T. Phosphate-binding tag, a  
775 new tool to visualize phosphorylated proteins. *Mol Cell Proteomics* **5**, 749-757 (2006).
- 776 63. Livak, K.J. & Schmittgen, T.D. Analysis of relative gene expression data using real-time  
777 quantitative PCR and the 2<sup>-Delta Delta C(T)</sup> Method. *Methods* **25**, 402-408 (2001).
- 778 64. Chaurasia, B., *et al.* Targeting a ceramide double bond improves insulin resistance and  
779 hepatic steatosis. *Science* **365**, 386-392 (2019).  
780

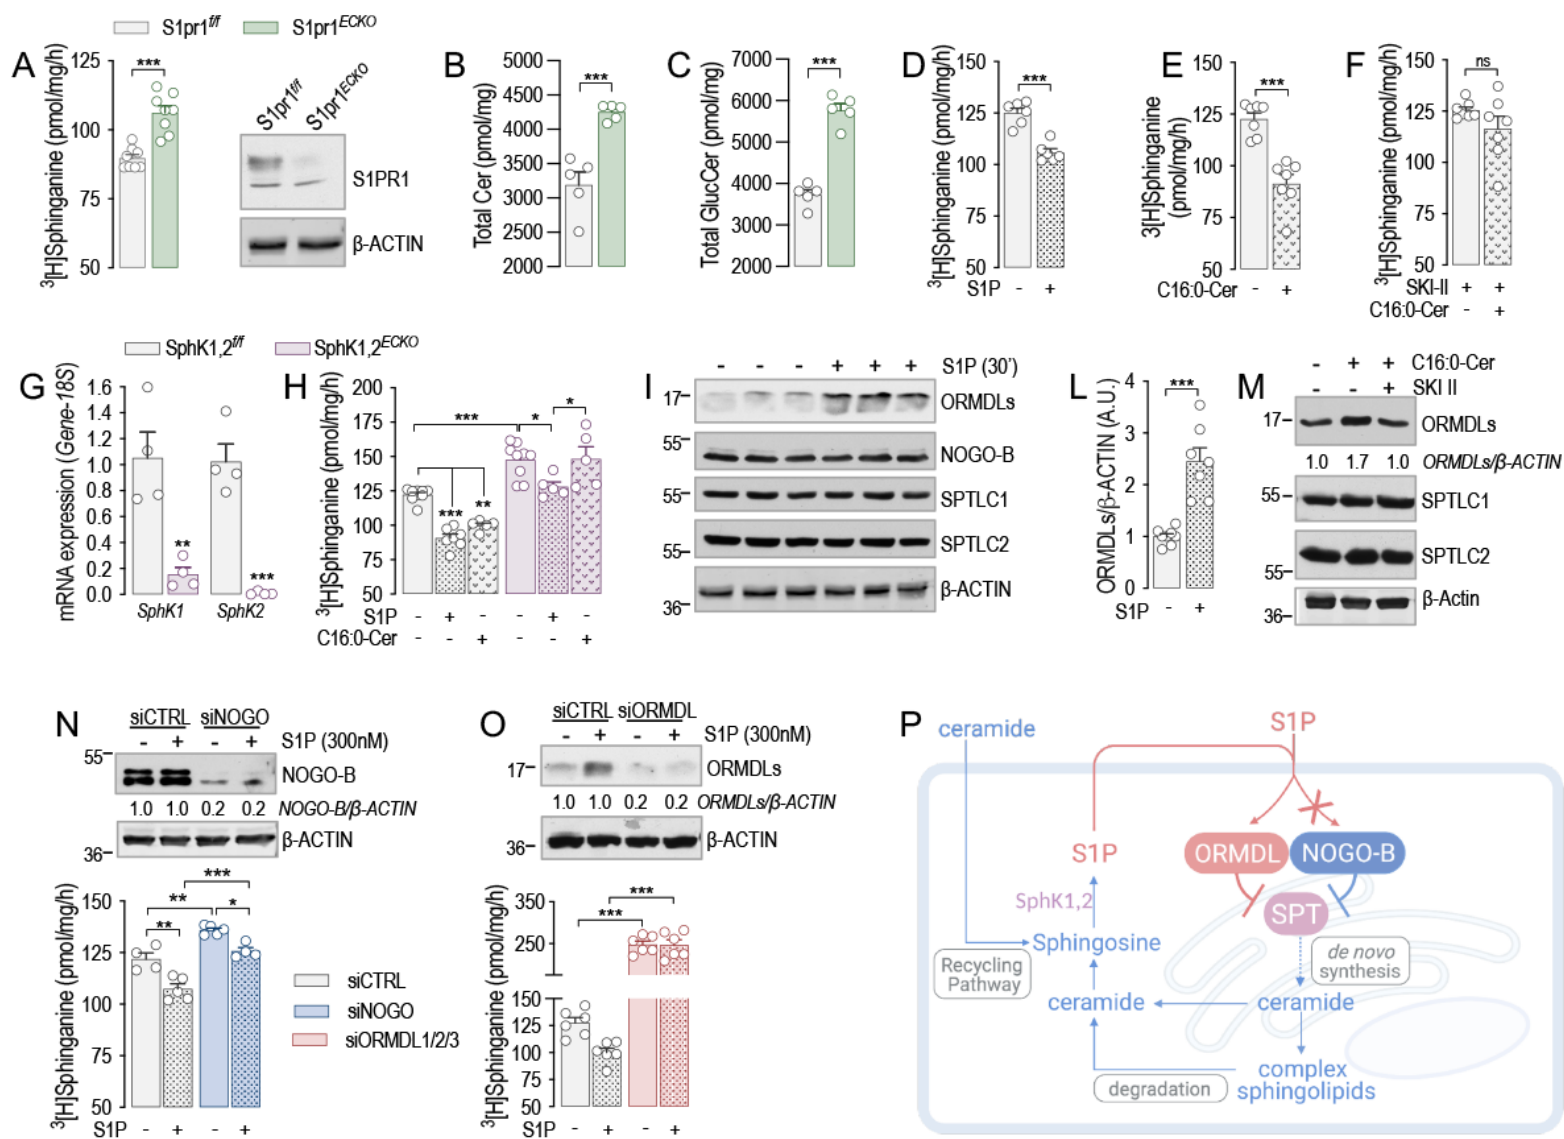

FIGURE 1

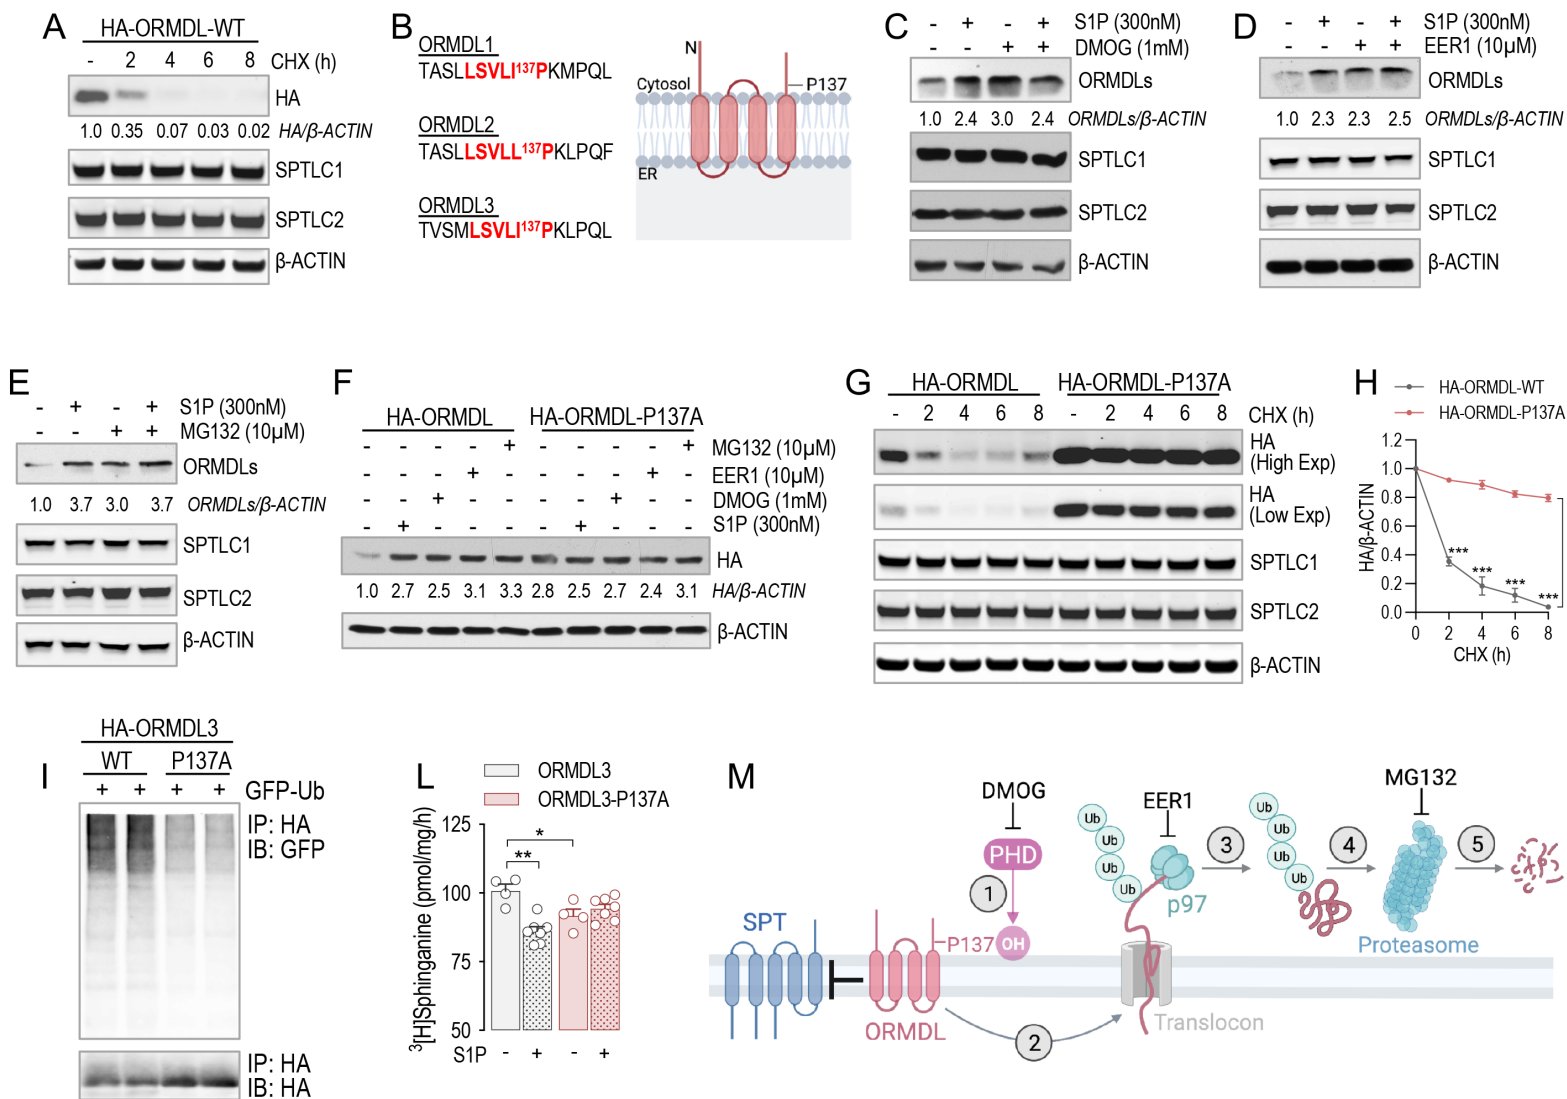

FIGURE 2



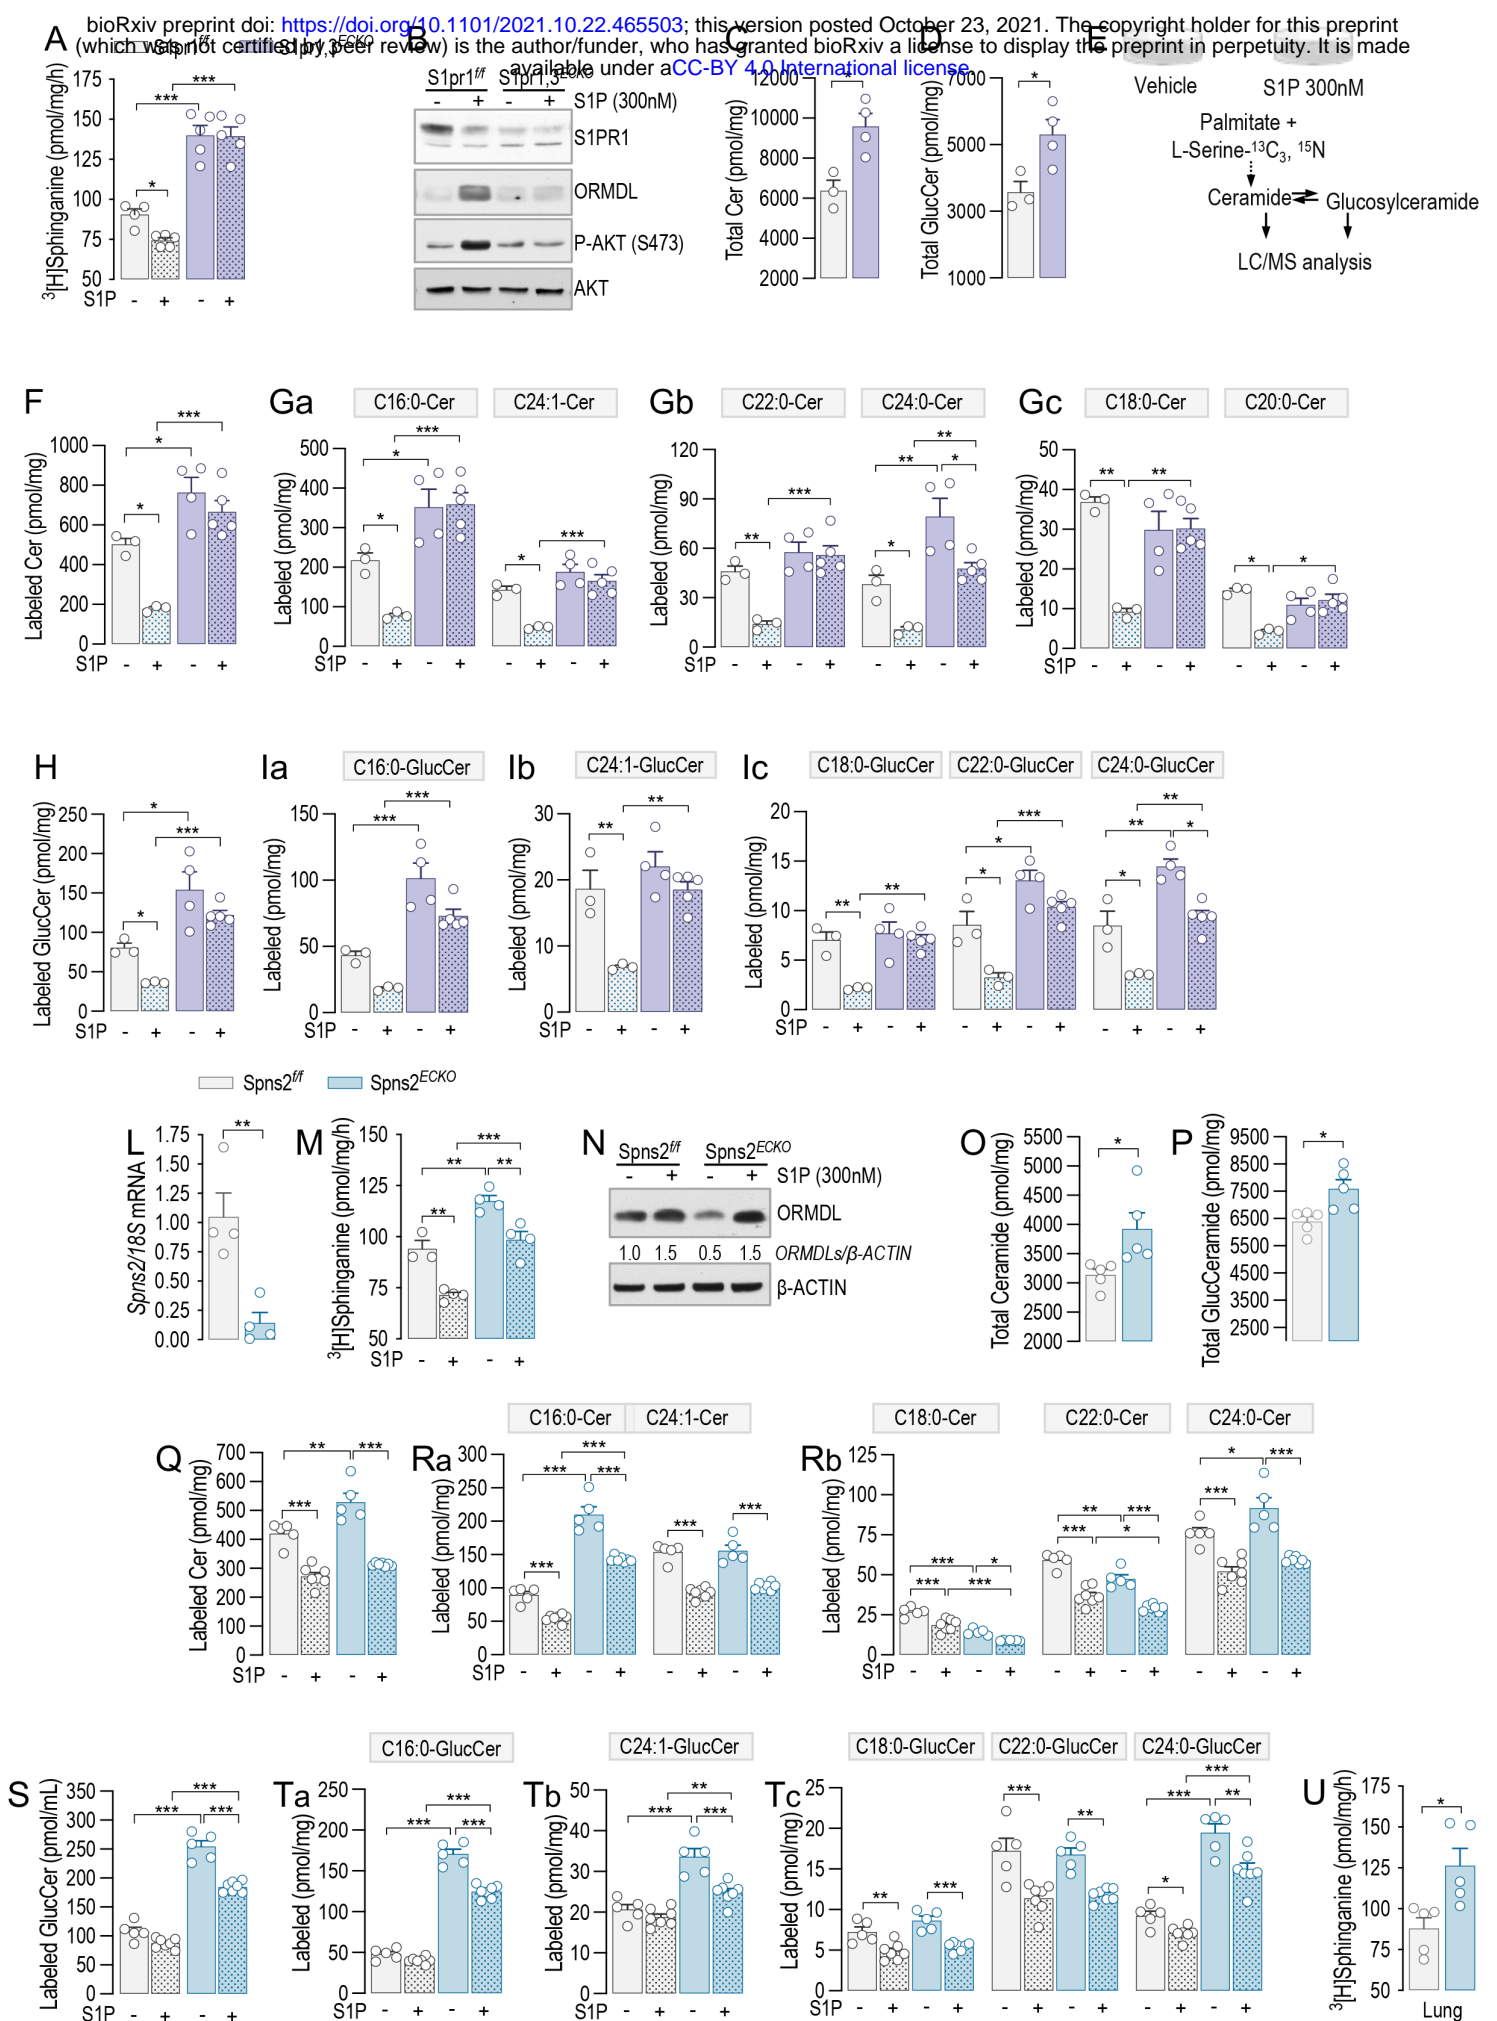

FIGURE 3

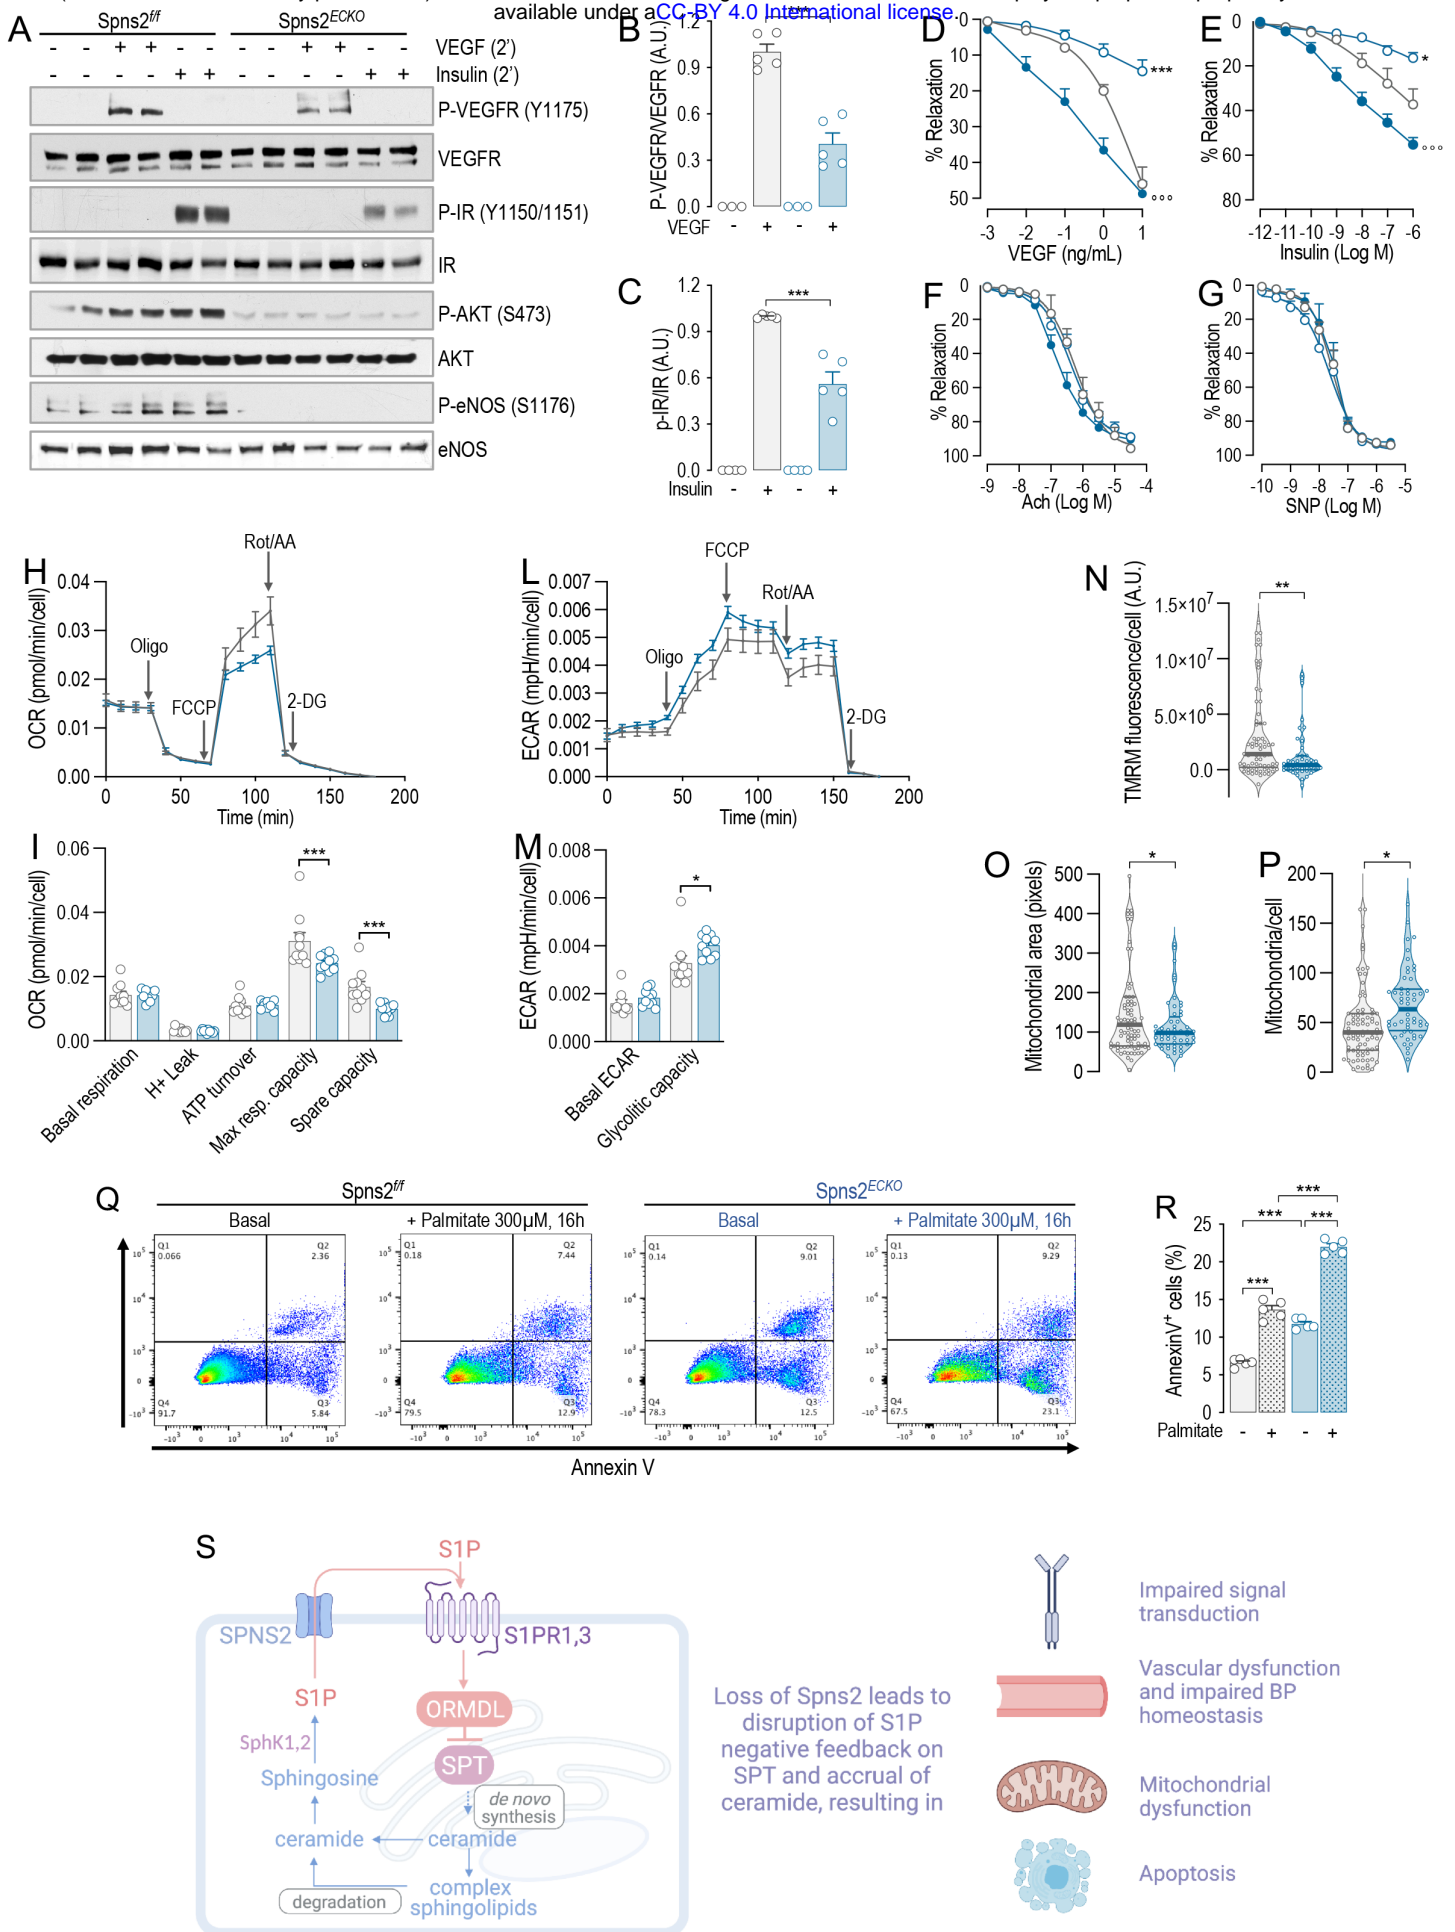

FIGURE 4



## **S1P controls endothelial sphingolipid homeostasis via ORMDL**

Linda Sasset, PhD<sup>1,2</sup>; Kamrul H. Chowdhury, PhD<sup>3</sup>; Onorina L. Manzo, PhD<sup>1,2,4</sup>;  
Luisa Rubinelli, BSc<sup>1,2</sup>; Csaba Konrad, PhD<sup>3</sup>; J. Alan Maschek<sup>3</sup>; Giovanni Manfredi,  
MD PhD<sup>2</sup>; William L. Holland, PhD<sup>3</sup>; Annarita Di Lorenzo, PhD<sup>1,2\*</sup>

<sup>1</sup>Department of Pathology and Laboratory Medicine, Cardiovascular Research Institute, Weill Cornell Medicine, 1300 York Avenue, New York, NY, 10021

<sup>2</sup>Brain and Mind Research Institute, Weill Cornell Medicine, 1300 York Avenue, New York, NY, 10021

<sup>3</sup>Department of Nutrition and Integrative Physiology, University of Utah College of Health, Salt Lake City, UT, 84112

<sup>4</sup>Department of Pharmacy, University of Naples "Federico II", Naples, Italy

### **\*Corresponding author:**

Annarita Di Lorenzo, Ph.D., Department of Pathology and Laboratory Medicine, Cardiovascular Research Institute, Feil Brain and Mind Research Institute, Weill Cornell Medical College, 1300 York Avenue, New York, NY, 10021, USA, Phone: (212) 746-6476, Fax: (212) 746-2290, E-mail: [and2039@med.cornell.edu](mailto:and2039@med.cornell.edu)

**Supplementary Figure 1.** LC- MS/MS quantification of total specific **(A-D)** ceramides and **(E-G)** glucosylceramides in S1pr1<sup>ff</sup> and S1Pr1<sup>ECKO</sup> endothelial cells after 4-OHT (1μM, 72h) treatment (n=5/group from 2 independent EC isolations/group; 4 mice/EC isolation). Data are expressed as mean±SEM. \*\*\*P≤0.001. Statistical significance was determined by unpaired t-test.

**Supplementary Figure 2.** Phosphate-affinity gel analysis of ORMDLs in HUVEC in absence or presence of S1P (300nM, 30').

**Supplementary Figure 3.** **(A)** Ct differences between genes and 18S determined by RT-PCR. Quantification of **(A)** SPTLC1, and **(B)** SPTLC2 (relative to **Fig. 2G**) in HUVEC lysates treated with CHX (10μM) for the indicated period of time, expressing HA-ORMDL3 or HA-ORMDL3-P137A. Data are expressed as mean±SEM. Statistical significance was determined by 2-way ANOVA with Tukey's post-test.

**Supplementary Figure 4.** **(A)** RT-PCR and **(B)** SPT activity for S1pr3 in mEC after siCTRL or siS1PR3 treatment (40nM, 72h) (n=4/group). LC-MS/MS quantification of total **(C)** Ceramide and **(D)** Glucosylceramide in mEC after siCTRL or siS1PR3 treatment (40nM, 72h) (n≥3/group). Data are expressed as mean±SEM. \*P≤0.05; \*\*\*P≤0.001. Statistical significance was determined by unpaired t-test.

**Supplementary Figure 5.** LC-MS/MS quantification of total specific **(A-B)** ceramides and **(C-E)** glucosylceramides in S1pr1,3<sup>ff</sup> and S1Pr1,3<sup>ECKO</sup> mEC after 4-OHT (1μM, 72h) and siS1PR3 (40nM, 72h) treatments (n≥3/group). LC-MS/MS quantification of total specific **(F-G)** ceramides and **(H-L)** glucosylceramides in Spns2<sup>ff</sup> and Spns2<sup>ECKO</sup> mEC after 4-OHT (1μM, 72h) treatment (n=5/group). Data are expressed as mean±SEM. \*P≤0.05; \*\*P≤0.01; \*\*\*P≤0.001. Statistical significance was determined by unpaired t-test.

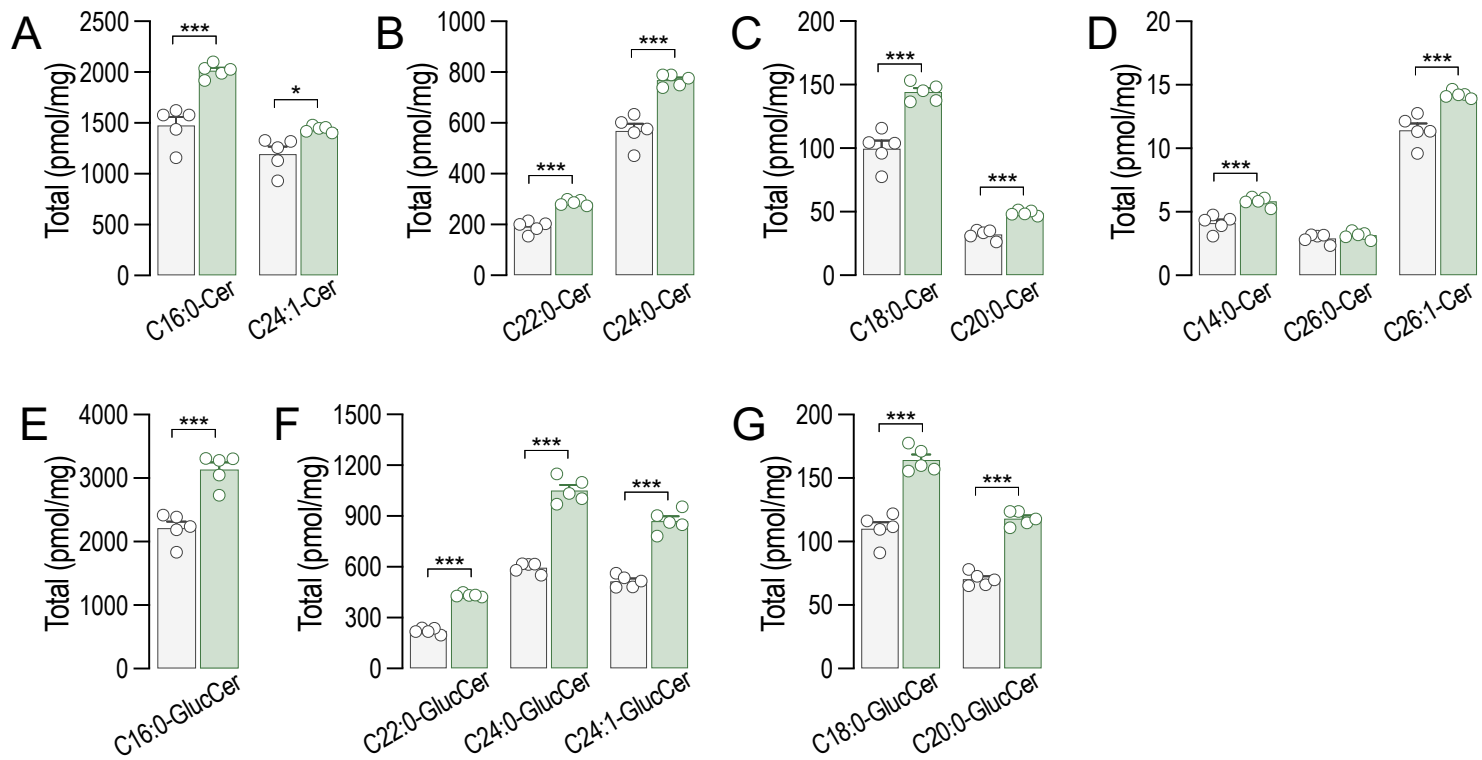

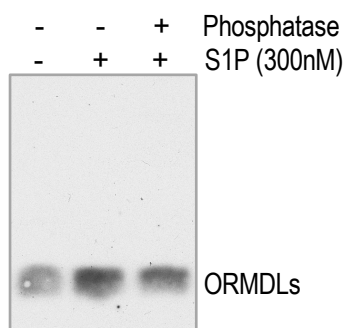

SUPPLEMENTARY FIGURE 2

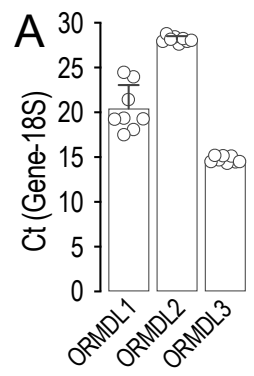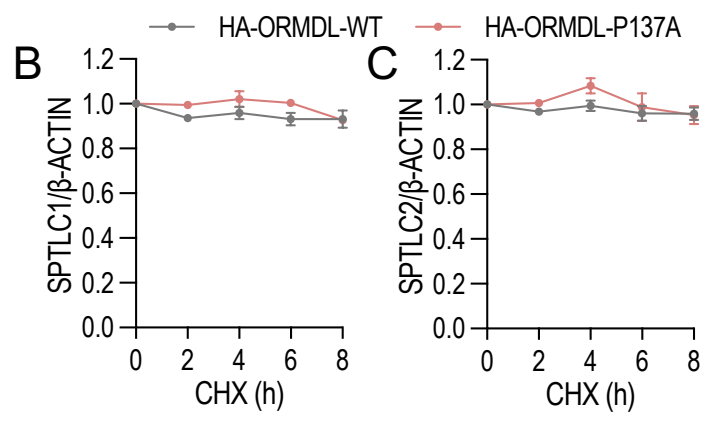

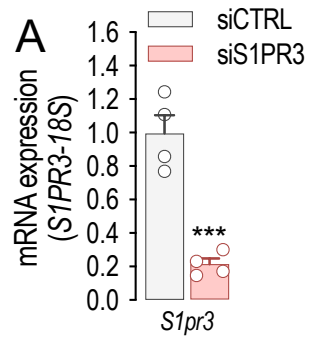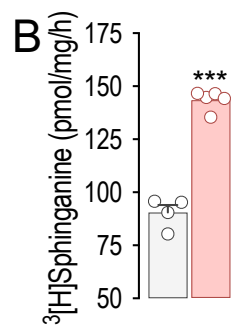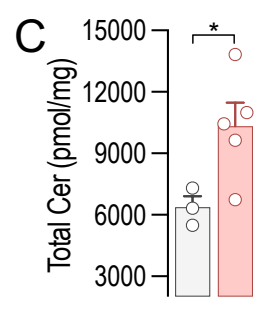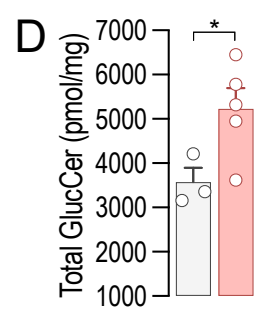

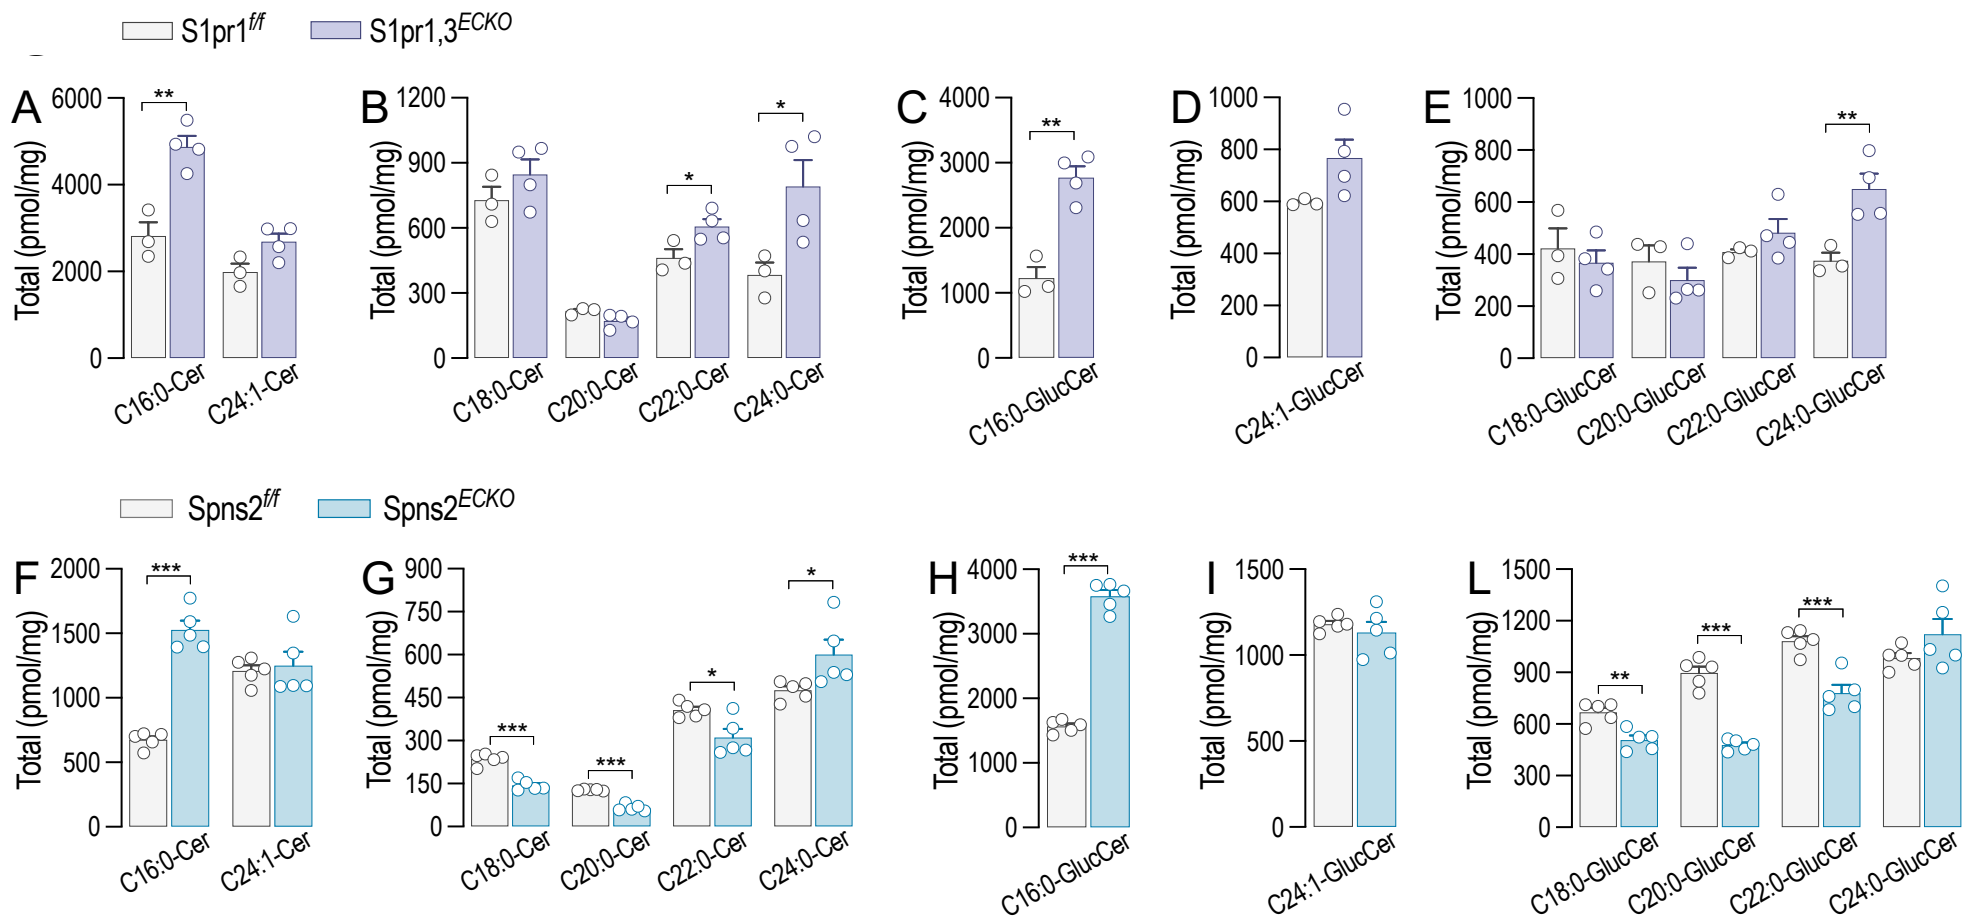

SUPPLEMENTARY FIGURE 5
